5

**Skeletal geometry and niche transitions restore organ size and shape  
during zebrafish fin regeneration**

10

Scott Stewart<sup>1,\*,#</sup>, Gabriel A. Yette<sup>1,2,#</sup>, Heather K. Le Bleu<sup>1,2</sup>, Astra L. Henner<sup>1</sup>, Joshua A. Braunstein<sup>1,2</sup>, Jad W. Chehab<sup>1</sup>, Michael J. Harms<sup>1,3</sup> and Kryn Stankunas<sup>1,2,\*</sup>

15

Short title: Skeletal geometry as positional information for fin regeneration

20

25 <sup>1</sup>Institute of Molecular Biology  
<sup>2</sup>Department of Biology  
<sup>3</sup>Department of Chemistry and Biochemistry  
University of Oregon  
273 Onyx Bridge  
30 1318 Franklin Blvd  
Eugene, OR 97403-1229  
Office: (541) 346-7416  
Fax: (541) 346-4854

35

\* Correspondence: [kryn@uoregon.edu](mailto:kryn@uoregon.edu); [sstewar2@uoregon.edu](mailto:sstewar2@uoregon.edu)

# Equal contributions

40

## SUMMARY

Regenerating fish fins return to their original size and shape regardless of the nature or extent of injury. Prevailing models for this longstanding mystery of appendage regeneration speculate fin  
45 cells maintain uncharacterized positional identities that instruct outgrowth after injury. Using zebrafish, we show differential Wnt production by pools of progenitor-maintaining niche cells promotes the correct extent of regeneration across the fin. We identify Dachshund transcription factors as niche markers and show the niche derives from mesenchyme populating cylindrical and progressively tapered fin rays. The niche, and consequently Wnt, steadily dissipates as  
50 regeneration proceeds; once exhausted, ray and fin growth stops. Supported by mathematical modeling, we show *longfin*<sup>2</sup> zebrafish regenerate exceptionally long fins due to a broken niche “countdown timer”. We conclude regenerated fin size is dictated by the amount of niche formed upon damage – which is simply dependent on the availability of intra-ray mesenchyme defined by skeletal girth at the injury site. This “transpositional scaling” model contends mesenchyme-  
55 niche state transitions and self-restoring skeletal geometry rather than cell memories determine a regenerated fin’s size and shape.

## MAIN TEXT

Regenerating organs restore their original size and shape after injury. Vertebrate appendage regeneration, including that of teleost fish fins, provides a striking example of this phenomenon. Major fin amputations, tiny resections, and cuts of diverse geometry all produce the same outcome – a restored fin matching the original’s form and in scale with the animal’s body. Spallanzani, Broussonet, and T. H. Morgan pioneered studies of this longstanding mystery of regeneration in the 18<sup>th</sup> and 19<sup>th</sup> centuries<sup>1,2</sup>. For example, Morgan used oblique caudal fin resections to show that regeneration rates initially correlate with the amount of tissue lost and then progressively slow, ultimately stopping growth when the original size is regained<sup>1</sup>.

Prevailing models, now largely from zebrafish studies, posit that fin tissue adjacent to damage sites interpret Cartesian coordinate-like positional information to trigger the appropriate rate and extent of re-growth. This concept supposes an extensive array of positional identities, some epigenetic mechanism for cells to store such identities, and, perhaps most puzzling, for the positional information to be restored during the regeneration process. Ultimately, however, the rate and extent of outgrowth is dictated by production of growth factors, including FGF<sup>3-6</sup> and Wnt<sup>7-10</sup>, with the net effect of promoting cellular proliferation. Therefore, understanding growth factor production dynamics provides a logical entry to uncover fin size and shape restoration mechanisms.

Wnt signals indirectly promote cell proliferation<sup>9</sup>, including by maintaining progenitor cells of the bone-producing osteoblast lineage<sup>10</sup>, to drive outgrowth until the fin is fully restored. Several Wnts including *wnt5a*, *wnt5b*, and *wnt10a* are produced in the distal regenerating fin<sup>7-11</sup>, including by distal blastema cells that we term the niche. We hypothesized differential Wnt production determines the rate and ultimately extent of regeneration. Revisiting Morgan’s

80 experiments<sup>1</sup>, we obliquely amputated adult zebrafish fins from the distal tip of the dorsal side to  
a proximal location ventrally (see Extended Data Fig. 1 for fin amputation planes and anatomical  
definitions). We then variably inhibited Wnt secretion by graded dosing of low concentrations of  
Wnt-C59<sup>10,12</sup>. Partial perturbation of Wnt signaling prevented dorsal but not ventral tissue  
regeneration (Fig. 1A-E). Similarly, medial tissue was more sensitive than lateral tissue to Wnt  
85 inhibition following perpendicular resections (Extended Data Fig. 2). We conclude differential  
Wnt production underlies reacquisition of the stereotypical shape of a zebrafish fin.  
Concordantly, levels of *wnt5a*, a representative distal blastema-expressed Wnt<sup>7-11</sup>, correlated with  
the demand for regenerative growth along the proximal-distal axis four days after oblique fin  
amputations (Fig. 1F, G).

90 Wnt signaling “strength” could be encoded either by the amount of Wnt produced per  
niche cell or the number of Wnt-producing niche cells. Regardless, we reasoned that  
understanding the properties of niche cells was key to deciphering size control mechanisms. We  
used RNA-Seq of 4 days post amputation (dpa) distal vs. proximal fin regenerates, as demarcated  
by the distal epidermal marker Tg(*shha:EGFP*)<sup>13</sup>, to identify niche-characterizing factors  
95 (Extended Data Fig. 3). Among transcription factors, the *dachshund* (*dach*) family members<sup>14,15</sup>  
*dacha* (5.9-fold) and *dachc* (6.0-fold) were notably distally enriched (Extended Data Fig. 3). We  
also used the RNA-Seq dataset to confirm the distal enrichment of several Wnts, with  
particularly high levels of *wnt5a* and *wnt5b* (Extended Data Fig. 3). *dachc* mimicked *wnt5a* in  
having notably higher expression levels in 4 dpa proximal tissue of diagonally amputated  
100 regenerating fins (Fig. 1H, I).

We used antibody staining to conclusively identify caudal fin cells that express Dach/a/c  
(hereafter referred to as Dach) over the course of fin regeneration (Fig. 1J-O). Dach-expressing

cells were rarely observed before 3 days post amputation (dpa) (Fig. 1J). At 3 dpa, Dach became robustly expressed in distal cells adjacent to, but distinct from, distal Runx2<sup>+</sup> pre-osteoblasts (Fig. 1K). Dach<sup>+</sup> niche cells then steadily reduced over the course of regeneration to a small residual population also found in distal tissue of unamputated fins (Fig. 1L-O). We conclude Dach transcription factors mark Wnt-producing niche cells throughout the course of regeneration. The three-day delay prior to the appearance of Dach<sup>+</sup> niche corresponds with the view that fin regeneration proceeds by an acute injury repair phase followed by a prolonged period of progressive outgrowth<sup>16</sup>. Finally, differential numbers of niche cells produced upon injury and then maintained through regeneration likely accounts for our observation that variable Wnt strength underlies fin outgrowth extents.

Canonical Wnt/ $\beta$ -catenin signaling during fin regeneration is confined to distal blastema / niche cells and pre-osteoblasts in which it indirectly promotes further proximal mesenchyme proliferation<sup>9</sup> and maintains a progenitor state<sup>10</sup>, respectively. However, a potential role for Wnt in maintaining the niche pool itself is unexplored. Using the new Dach marker, we found that pan-Wnt inhibition initiated at 4 dpa using Wnt-C59 rapidly depleted niche cells (Extended Data Fig. 4). Wnt inhibition prevented outgrowth but did not disrupt osteoblast differentiation, joint formation, or skeletal maturation (Extended Data Fig. 4), reinforcing our previous insight that Wnt/ $\beta$ -catenin promotes bone progenitor maintenance upstream of and in opposition to differentiation<sup>10</sup>. Wnt, whether canonical or non-canonical, appears to have an analogous autocrine role – maintaining the niche population in a state whereby it can orchestrate continued regeneration.

The loss of niche cells upon Wnt inhibition allowed us to test if artificial depletion of the niche pool mimics normal termination of regeneration – as supported by our observation that

Dach<sup>+</sup> niche cells progressively decrease over regeneration. Wnt inhibition irreversibly blocked fin regeneration, with only rare outgrowth seen long after drug removal (Extended Data Fig. 4). In contrast, re-amputating Wnt-inhibited fins re-initiated full regeneration. Small molecule inhibition of FGF receptor signaling prevented outgrowth to the same degree as Wnt inhibition (Extended Data Fig. 4). However, as FGF inhibition did not deplete Dach<sup>+</sup> niche cells (Extended Data Fig. 4), regeneration resumed following drug washout, matching previous observations<sup>5</sup>. Therefore, mitogenic FGF, which appears niche-expressed<sup>3</sup> and is Wnt-dependent<sup>9</sup>, acts downstream of Wnt's niche maintenance role. Niche cell numbers then set dynamic levels of both signaling proteins and therefore outgrowth rate. Regeneration ceases when the niche pool, and correspondingly Wnt and FGF production, depletes below an effective level. These observations underscore that understanding instructive growth control mechanisms requires revealing niche cell origins and fates.

Regenerated fin tissues are derived from progenitor cells formed by de-differentiation of mature cells extant at the injury site<sup>16</sup>. We used a mosaic lineage tracing system to permanently label different cell populations in uninjured fins<sup>17</sup> and then track which lineage generates Dach<sup>+</sup> niche cells during regeneration. Intra-ray mesenchyme, cells within the cylindrical bony rays, generated Dach<sup>+</sup> niche cells (Fig. 2A-D). Many blastema cells derive from intra-ray mesenchymal cells that upregulate *tryptophan hydroxylase 1b* (*tph1b*) upon injury<sup>18</sup>. These cells, including those that populate the distal blastema, are a source of replacement ray mesenchyme<sup>18</sup>. We confirmed Dach<sup>+</sup> niche cells share this lineage using the *Tg(tph1b-mCherry)* reporter line (Fig. 2E-F). Similarly, the distal-most *Msx*-expressing blastema cells were Dach-positive (Fig. 2G).

The mesenchymal cell state marker Snail<sup>19</sup> was expressed in non-injured intra-ray mesenchyme and proximal blastema cells (Fig. 2H, I). In contrast, Snail was absent from Dach<sup>+</sup> niche cells except for a small population of transitioning double Dach<sup>+</sup>/Snail<sup>+</sup> cells (Fig. 2I).  
150  
Concordantly, *snai2* transcripts were abundant in blastema mesenchyme but undetectable in distal-most tissue (Extended Data Fig. 5). Dach-positive cells incorporated EdU even with a brief 4-hour pulse prior to tissue collection, showing the niche population includes actively proliferating cells (Extended Data Fig. 5). These observations support a cyclical model whereby  
155 fin amputation induces a delayed transition of Snail<sup>+</sup> intra-ray mesenchyme to a Dach<sup>+</sup> niche state (Fig. 2J, K; Extended Data Fig. 6). The Dach-expressing niche cells both proliferate and progressively convert back to Snail<sup>+</sup> mesenchyme that re-populates regenerated bony rays.

The unique origin of niche cells from intra-ray mesenchyme led us to consider that skeletal geometry might instruct how much niche is formed upon amputation. By this model,  
160 resecting a larger bony ray, with a relatively high volume capacity for mesenchyme, would produce a larger initial niche population and therefore more regeneration. In support, the size of fin ray bone segments noticeably tapers along the proximal-to-distal axis (Fig. 3A-E). Further, longer lateral rays are wider at their base than shorter medial rays. 3-D micro-CT analysis confirmed this assessment and underscored that the internal geometry of the rays approximates  
165 cylinders (Extended Data Fig. 7, Supplementary Video 1). We measured the radius of the medial sixteen rays at a fixed proximal-distal position and then plotted the squared values (as a proportional surrogate for bone segment cylindrical volume) as adjacent bars. The V-shape formed by the bars' distribution neatly matched that of a zebrafish fin by closely approximating distributed ray lengths (Fig. 3A).

170 This model predicts niche amount should vary by proximal-distal amputation position,  
correlating with the tapering bony rays. Whole-mount in situ hybridization for *dachc* transcripts  
at 3 dpa, the time of niche formation, revealed that proximal amputations produced large *dachc*-  
expressing niche pools while distal cuts generated progressively smaller niches (Fig. 3F-H).  
Further, *dachc* expression across the dorsal-to-ventral fin axis correlated with regenerative  
175 demand upon perpendicular resections (Extended Data Fig. 8) – as with diagonal amputations  
(Fig. 1H, I). Lateral regions that re-form the longest rays expressed high levels of *dachc*. In  
contrast, medial tissue that generates short rays to restore the original V-shaped fin produced  
small *dachc*-marked niches.

We used mathematical modeling to further explore if skeletal geometry coupled with  
180 progressive niche depletion could account for robust size restoration during fin regeneration. We  
started by assuming outgrowth rate is proportional to the current number of distal niche cells.  
The bony ray area exposed upon resection, as a linear proxy for cylinder volume, determines the  
number of initial niche cells. A niche that collectively re-differentiates faster than it proliferates  
establishes a “countdown timer”. The number of initial niche cells sets the timer, which ends  
185 outgrowth when the niche population depletes below some effective level. As such, bony ray size  
at the amputation site ultimately instructs regenerated ray length.

We solved differential equations to derive a final equation describing regenerated ray  
length as a function of ray radius at the amputation position:

$$l(t_{end}) = \frac{k_l}{\alpha} (N_\phi - \beta\pi r^2)$$

where  $k_l$  is the rate of length growth per niche cell,  $\alpha$  is the difference in niche cell growth rate  
190 versus rate of differentiation back to intra-ray mesenchymal cells,  $N_\phi$  is the number of niche cells  
below which growth stops, and  $\beta$  is the number of niche cells released per ray cross-sectional



area. Mathematically exploring the formula reinforced the conclusion that  $\alpha$  must be negative to provide net niche depletion. Solving expected regenerated ray lengths using measured ray radii and optimized constants produced a distribution largely matching actual measured lengths (Fig. 195 3I) – naturally matching normalized radius<sup>2</sup> distributions. The linear relationship between ray radius squared and remaining ray length from the measurement position held across the proximal-distal fin axis (Fig. 3J, R-squared = 0.7). Likewise, existent ray lengths from a hypothetical injury point largely matched theoretical regenerated lengths derived from radius measurements and our growth equation (Fig. 3K).

200 Several zebrafish mutants develop and regenerate long fins, including dominant *longfin*<sup>12</sup><sup>20</sup>, well known as one of two mutations characterizing the *Tüpfel longfin* (*TL*) strain<sup>21</sup> (Fig. 4A, B). *longfin*<sup>12</sup> ray radius measurements predicted overall fin shape but greatly under-anticipated ray lengths (Fig. 4C). Therefore, the skeleton was not proportionally re-scaled during development and instead suggesting *longfin*<sup>12</sup> disrupts a fin outgrowth regulatory mechanism. We 205 used our mathematical model to predict the growth-determining parameter disrupted in *longfin*<sup>12</sup> fish. The cell proliferation rate ( $k_i$ ) could be larger (e.g. increased mitogen production or mitogen sensitivity),  $\beta$  could be larger, establishing a larger niche pool upon injury, or  $\alpha$  could be “less negative”, leading to niche perdurance. Changing  $k_i$  or  $\beta$  vs.  $\alpha$  had distinct theoretical effects when plotting expected regenerative growth over time and growth rate over time (Fig. 4D, E). 210 Following amputation, *longfin*<sup>12</sup> fish showed prolonged regenerative growth rather than increased initial growth or peak growth rate (Fig. 4F, G; Extended Data Fig. 9), suggesting they have a persistent niche (less negative  $\alpha$ ) rather than enhanced niche generation ( $\beta$ ) or increased cellular growth rate ( $k_i$ ).

We examined *dachc* expression in *longfin*<sup>2</sup> heterozygotes following fin resection to see if  
215 niche dynamics were disrupted as anticipated by our modeling (Fig. 4H-Q). *longfin*<sup>2</sup> fish initially  
formed a normal-sized niche. However, unlike wildtype clutchmates, their *dachc*-expressing  
niche only slowly depleted, implicating a less negative  $\alpha$  constant. Increasing  $\alpha$  while inputting  
*longfin*<sup>2</sup> ray radii measurements largely predicted actual *longfin*<sup>2</sup> regenerated ray lengths  
(Extended Data Fig. 10). These results support the robustness of our model and show that  
220 *longfin*<sup>2</sup> disrupts the niche depletion system.

We conclude ray widths are transposed into regenerated ray lengths, and hence fin form,  
via the amount of intra-ray mesenchyme exposed upon ray resection. The mesenchyme  
transitions into a concordantly sized outgrowth-promoting niche pool that then steadily depletes,  
ultimately returning the regenerated fin to its original size and shape. In 1929, Samuel Nabrit  
225 similarly concluded: “... in [*fin*] regeneration the rate of growth and consequently the form is  
controlled locally by the cross-sectional area of the fin rays exposed”<sup>22</sup>. The mesenchyme itself  
is therefore Nabrit’s predicted growth promoting “fin ray end substance”. Positional information  
stored in skeletal geometry is self-restoring since a depleting niche progressively directs slower  
outgrowth and narrower bones due to its diminishing progenitor-maintenance capacity. We use  
230 the term “transpositional scaling” to describe this model for organ size determination – a new  
answer to an age-old question of appendage regeneration.

Vertebrate appendage regeneration, including that in zebrafish fins, is used as compelling  
evidence for pattern formation by Cartesian coordinate-defined cellular positional identities<sup>23</sup>.  
However, our transpositional scaling model does not require fin cells retain any such molecular  
235 information. Similarly, the hypothesized “pre-pattern” established early in a regenerating  
blastema that directs regional outgrowth<sup>18,24-26</sup> can be explained by skeletal geometry-defined

niche cell numbers alone. The state transition mechanisms that generate the niche and drive its progressive depletion are then identical throughout the fin but produce differential, predictable output depending on the starting condition defined by ray widths.

240            Could similar models apply in other circumstances where an organ is restored to form and scale? The hemi-ray bones in zebrafish fins appose to approximate cylinders, conveniently enabling consideration of the geometric storage of a growth-promoting cell lineage. Urodele amphibian limb regeneration is another striking model of size and pattern restoration. Matching our idea, an older model proposes that initial blastema mass rather than origin determines which  
245 proximal-distal limb skeletal elements regenerate<sup>27</sup>. However, urodele limb cartilage/bones are solid and therefore position-defining geometric reservoirs of a hypothetical niche lineage would have to lie around rather than inside skeletal structures. Intriguingly, urodele limb positional information is stored in connective tissue mesenchyme surrounding bones, albeit reportedly by molecular memories<sup>28-30</sup>. Regardless, progenitor cell supporting-niche populations are a common  
250 component of organ growth, homeostasis, and regeneration<sup>31,32</sup>. Our simple model, inherently dependent on regulatory networks with the positional information stored in tissue geometry rather than molecular information, establishes a compelling paradigm to explore in many contexts.

## REFERENCES

- 255
1. Morgan, T. H. Regeneration in teleosts. *Archiv für Entwicklungsmechanik der Organismen* **10**, 120–134 (1900).
  2. Broussonet, M. Observations sur la régénération de quelques parties du corps des  
260 poissons. *Histoire de l'Académie Royale des Sciences* 684–688 (1786).
  3. Whitehead, G. G., Makino, S., Lien, C.-L. & Keating, M. T. fgf20 is essential for initiating zebrafish fin regeneration. *Science* **310**, 1957–1960 (2005).
  - 265 4. Poss, K. D. *et al.* Roles for Fgf signaling during zebrafish fin regeneration. *Developmental Biology* **222**, 347–358 (2000).
  5. Lee, Y., Grill, S., Sanchez, A., Murphy-Ryan, M. & Poss, K. D. Fgf signaling instructs position-dependent growth rate during zebrafish fin regeneration. *Development* **132**,  
270 5173–5183 (2005).
  6. Shibata, E. *et al.* Fgf signalling controls diverse aspects of fin regeneration. *Development* **143**, 2920–2929 (2016).
  - 275 7. Stoick-Cooper, C. L. *et al.* Distinct Wnt signaling pathways have opposing roles in appendage regeneration. *Development* **134**, 479–489 (2007).
  8. Kawakami, Y. *et al.* Wnt/beta-catenin signaling regulates vertebrate limb regeneration. *Genes Dev.* **20**, 3232–3237 (2006).
  - 280 9. Wehner, D. *et al.* Wnt/ $\beta$ -catenin signaling defines organizing centers that orchestrate growth and differentiation of the regenerating zebrafish caudal fin. *Cell Reports* **6**, 467–481 (2014).
  - 285 10. Stewart, S., Gomez, A. W., Armstrong, B. E., Henner, A. & Stankunas, K. Sequential and opposing activities of Wnt and BMP coordinate zebrafish bone regeneration. *Cell Reports* **6**, 482–498 (2014).
  11. Poss, K. D., Shen, J. & Keating, M. T. Induction of *lef1* during zebrafish fin regeneration.  
290 *Dev. Dyn.* **219**, 282–286 (2000).
  12. Proffitt, K. D. *et al.* Pharmacological inhibition of the Wnt acyltransferase PORCN prevents growth of WNT-driven mammary cancer. *Cancer Res.* **73**, 502–507 (2013).
  - 295 13. Ertzer, R. *et al.* Cooperation of sonic hedgehog enhancers in midline expression. *Developmental Biology* **301**, 578–589 (2007).

14. Mardon, G., Solomon, N. M. & Rubin, G. M. dachshund encodes a nuclear protein required for normal eye and leg development in *Drosophila*. *Development* **120**, 3473–3486 (1994).  
300
15. Shen, W. & Mardon, G. Ectopic eye development in *Drosophila* induced by directed dachshund expression. *Development* **124**, 45–52 (1997).
- 305 16. Chen, C.-H. & Poss, K. D. Regeneration Genetics. *Annu. Rev. Genet.* **51**, 63–82 (2017).
17. Stewart, S. & Stankunas, K. Limited dedifferentiation provides replacement tissue during zebrafish fin regeneration. *Developmental Biology* **365**, 339–349 (2012).
- 310 18. Tornini, V. A. *et al.* Live Monitoring of Blastemal Cell Contributions during Appendage Regeneration. *Curr. Biol.* **26**, 2981–2991 (2016).
19. Lamouille, S., Xu, J. & Derynck, R. Molecular mechanisms of epithelial-mesenchymal transition. *Nat Rev Mol Cell Biol* **15**, 178–196 (2014).  
315
20. Van Eeden, F. J. *et al.* Genetic analysis of fin formation in the zebrafish, *Danio rerio*. *Development* **123**, 255–262 (1996).
21. Haffter, P. *et al.* Mutations affecting pigmentation and shape of the adult zebrafish. *Dev. Genes Evol.* **206**, 260–276 (1996).  
320
22. Nabrit, S. M. The role of the fin rays in the regeneration in the tail-fins of fishes. *Biological Bulletin LVI*, 235–266 (1929).
- 325 23. Wolpert, L. Positional Information and Pattern Formation. *Curr. Top. Dev. Biol.* **117**, 597–608 (2016).
24. Rolland-Lagan, A.-G., Paquette, M., Tweedle, V. & Akimenko, M.-A. Morphogen-based simulation model of ray growth and joint patterning during fin development and regeneration. *Development* **139**, 1188–1197 (2012).  
330
25. Nachtrab, G., Kikuchi, K., Tornini, V. A. & Poss, K. D. Transcriptional components of anteroposterior positional information during zebrafish fin regeneration. *Development* **140**, 3754–3764 (2013).  
335
26. Rabinowitz, J. S. *et al.* Transcriptomic, proteomic, and metabolomic landscape of positional memory in the caudal fin of zebrafish. *Proc. Natl. Acad. Sci. U.S.A.* **114**, E717–E726 (2017).
- 340 27. de Both, N. J. The developmental potencies of the regeneration blastema of the axolotl limb. *Wilhelm Roux Arch Entwickl Mech Org* **165**, 242–276 (1970).

28. Kragl, M. *et al.* Cells keep a memory of their tissue origin during axolotl limb regeneration. *Nature* **460**, 60–65 (2009).  
345
29. Nacu, E. *et al.* Connective tissue cells, but not muscle cells, are involved in establishing the proximo-distal outcome of limb regeneration in the axolotl. *Development* **140**, 513–518 (2013).
30. McCusker, C. D., Diaz-Castillo, C., Sosnik, J., Q Phan, A. & Gardiner, D. M. Cartilage and bone cells do not participate in skeletal regeneration in *Ambystoma mexicanum* limbs. *Developmental Biology* **416**, 26–33 (2016).  
350
31. Chacón-Martínez, C. A., Koester, J. & Wickström, S. A. Signaling in the stem cell niche: regulating cell fate, function and plasticity. *Development* **145**, dev165399 (2018).  
355
32. Yamashita, Y. M. & Tumber, T. Stem cells and their niche in homeostasis/regeneration and disease. *Mol. Biol. Cell* **25**, 736–736 (2014).  
360

## ENDNOTES

### Acknowledgements

We thank C. Kimmel and V. Devasthali for feedback on the manuscript; the Stankunas lab for  
365 discussions; E. Shaw for technical assistance; the University of Oregon X-ray Imaging Core and  
A. Lin for assisting with micro-CT; K. Poss and ZIRC for providing zebrafish lines; and the  
DSHB for antibodies. The National Institutes of Health (NIH) provided research funding  
(1R01GM127761 (K. S. and S. S.) and 5R03AR067522 (S. S.)). G. A. Y. was supported by a  
NIH NRSA graduate fellowship (5F31AR071283). H. K. L. received support from the  
370 University of Oregon Developmental Biology Training Program (5T32HD007348).

### Author contributions

S. S., G. A. Y., H. K. L. and K. S. designed experiments. S.S., G. A. Y., H. K. L., A. L. H., J. A.  
B., and J. C. performed experiments. K. S. and M. J. H. led the mathematical modeling. K. S.  
and S. S. prepared and wrote the manuscript with input from M. J. H., G. A. Y., H. K. L., and A.  
375 L. H.

### Author Information

The authors declare no competing interests.

Correspondence and requests for materials should be addressed to [kryn@uoregon.edu](mailto:kryn@uoregon.edu)

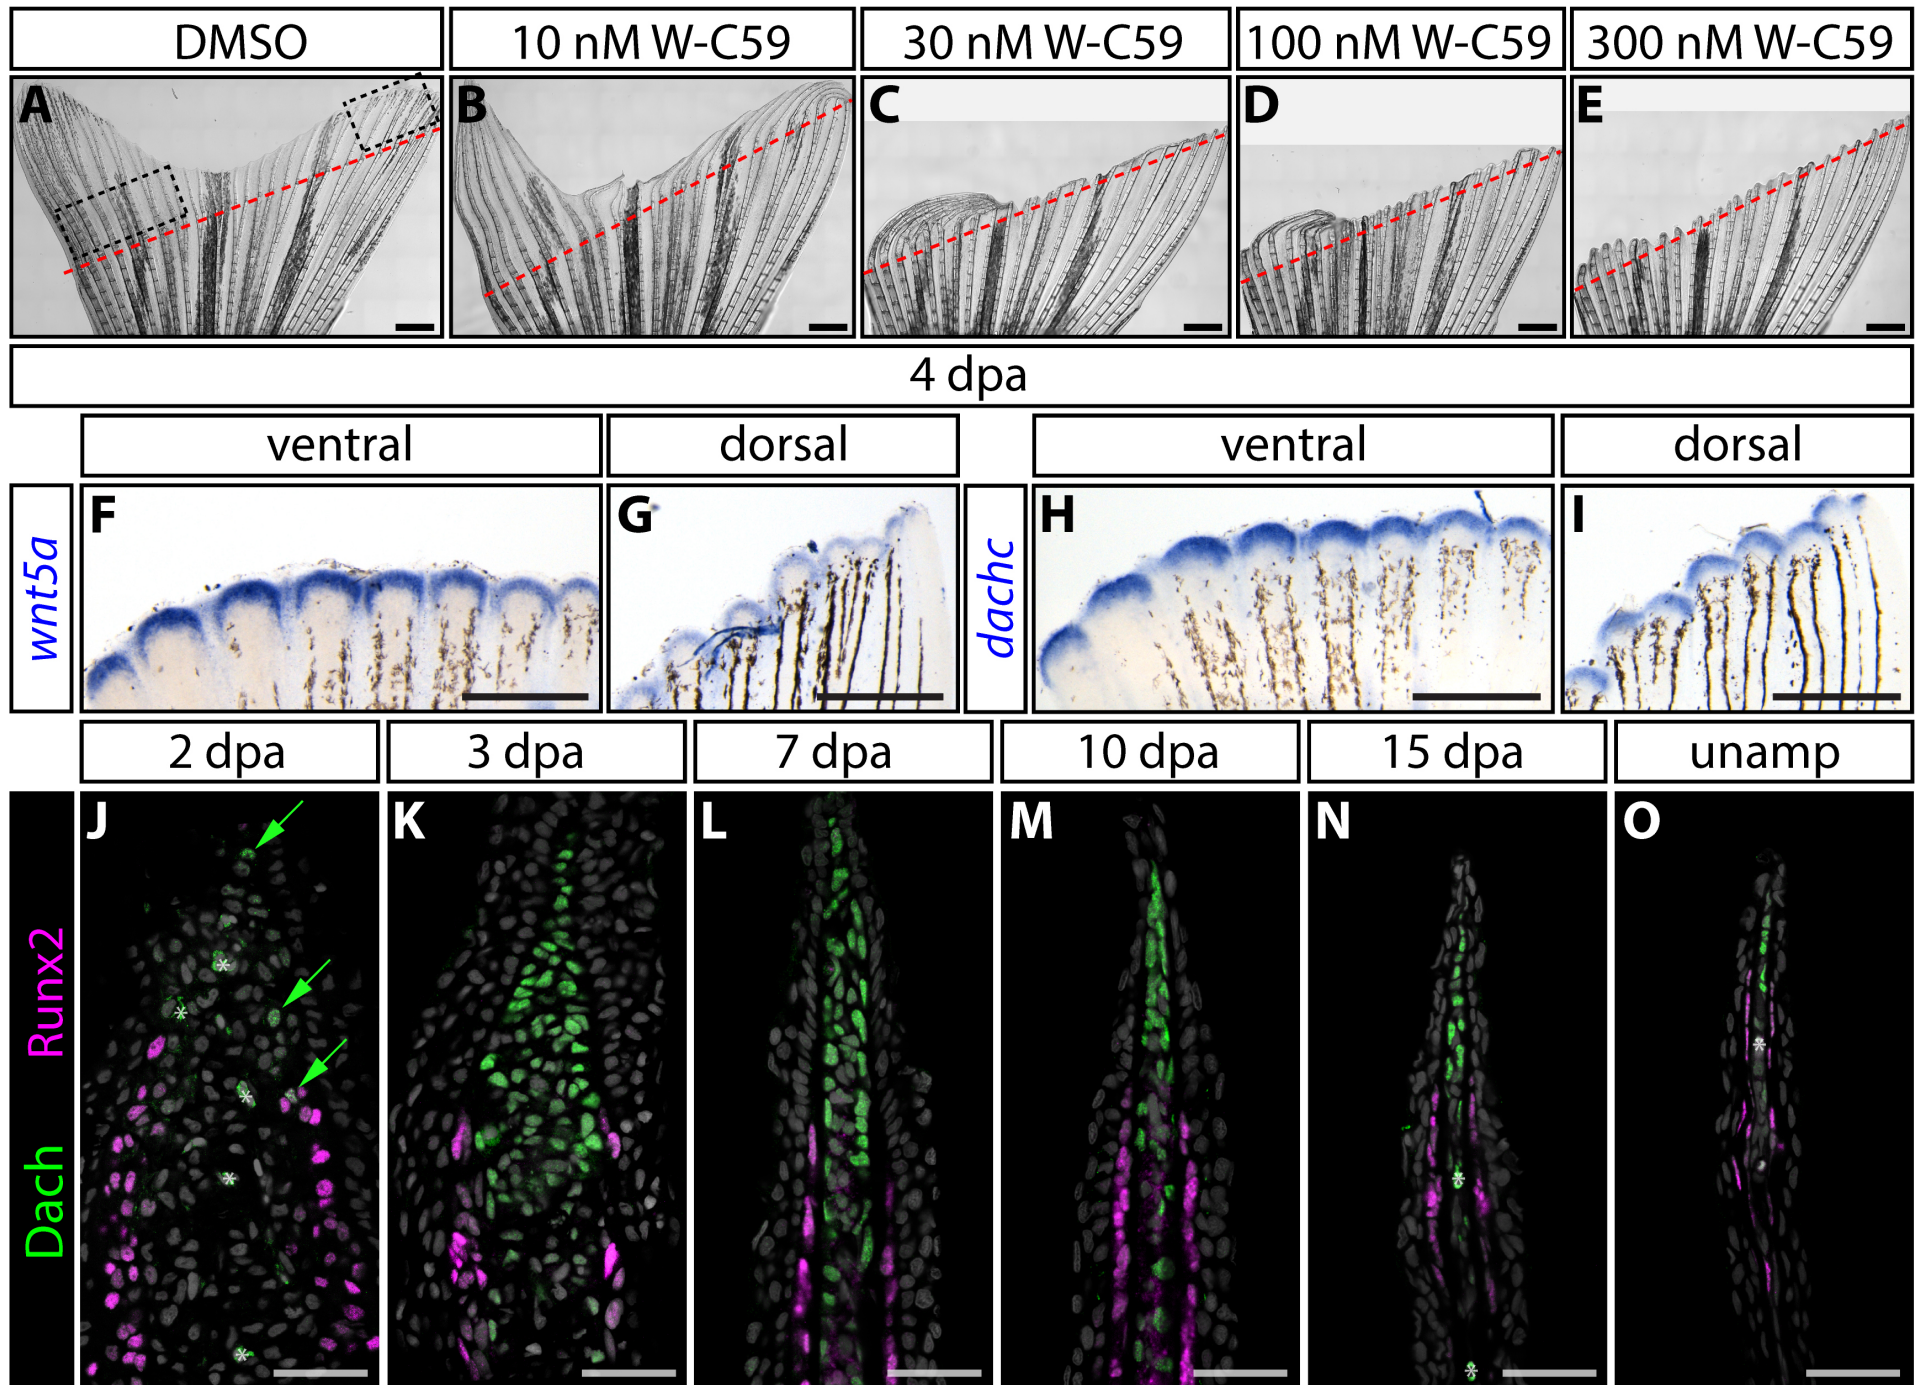

**Figure 1. Dachshund transcription factors define Wnt-producing and growth-determining niche cells of regenerating fins.**



**Figure 1. Dachshund transcription factors define Wnt-producing and growth-determining niche cells of regenerating fins.**

(A-E) Sensitivity to Wnt inhibition inversely correlates with demand for regenerative growth. 385 Diagonally fin-amputated zebrafish exposed to increasing concentrations of Wnt-C59 Porcupine inhibitor and imaged at 14 days post amputation (dpa). Red dashed lines show the amputation plane. Scale bars are 1 mm. (F-I) The size of distal *wnt5a* and *dachc* expression domains positively correlate with regenerative demand following diagonal amputations. Images compare whole mount RNA in situ hybridization signal intensities between ventral (more proximal) and 390 dorsal (more distal) sites along the diagonal resection plane, approximated by dashed boxes in (A). Scale bars are 500  $\mu$ m. (J-O) Dachshund-expressing cells localize to the niche cells (a distal blastema population) distinct from adjacent Runx2-expressing progenitor osteoblasts. Dach<sup>+</sup> cells are first observed at 2 dpa, peak in number around 3 dpa, and then progressively decrease to a small residual pool that is also present in unamputated fins. Images show antibody-stained regenerating fin sections at the indicated times post-amputation. Dach (green) and Runx2 395 (magenta) expression. Hoechst-stained nuclei are grey. Asterisks denote red blood cells. Scale bars are 25  $\mu$ m.

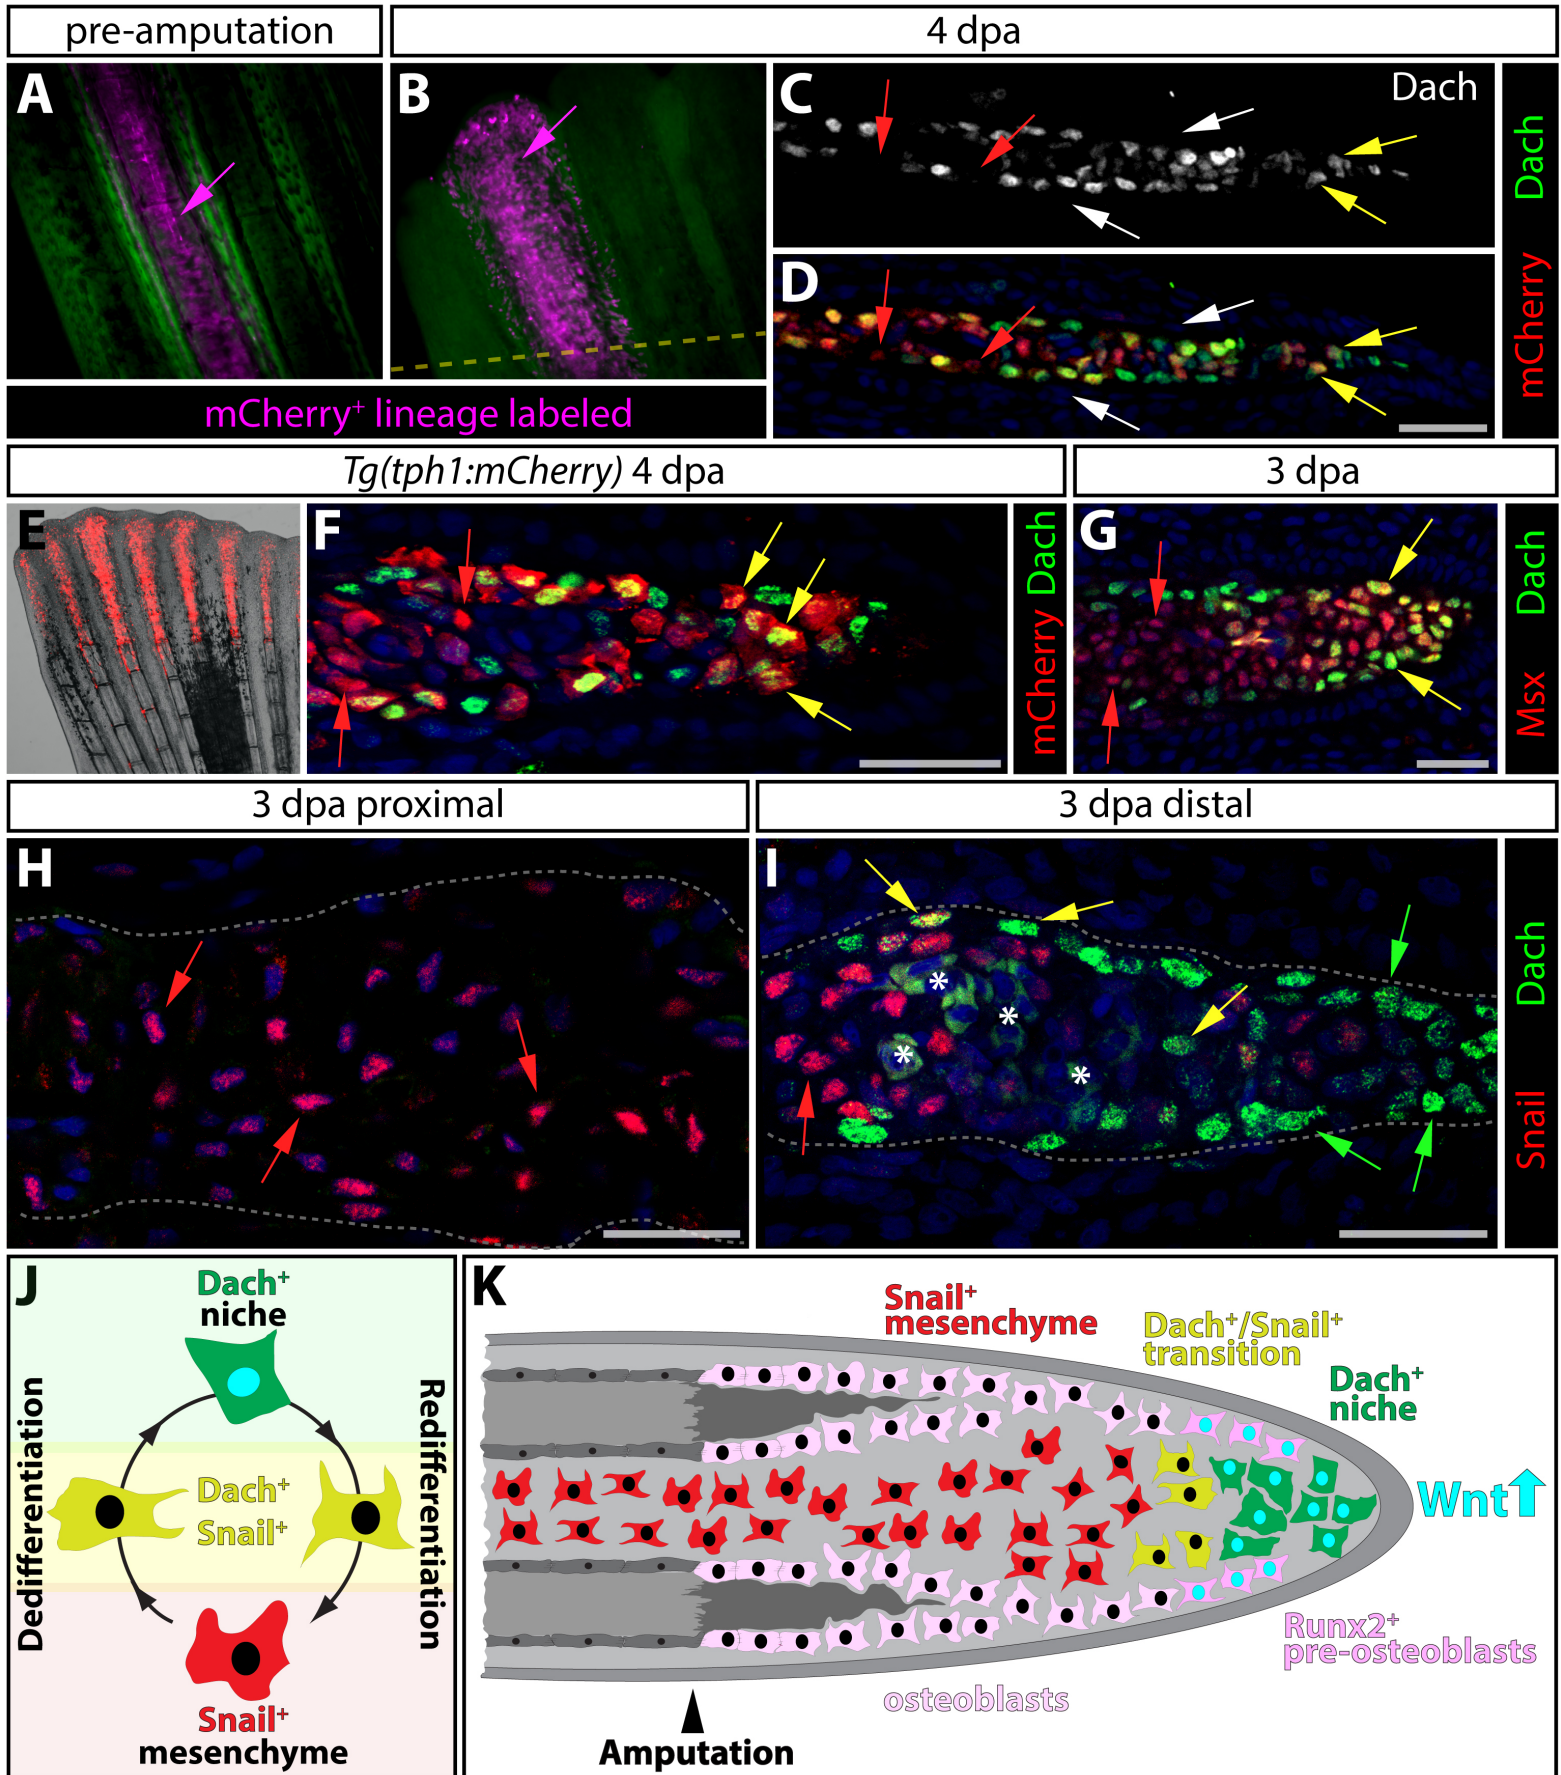

Figure 2. Niche cells are generated from state-transitioning intra-ray mesenchyme.

**Figure 2. Niche cells are generated from state-transitioning intra-ray mesenchyme.**

400 **(A-D)** Genetic mosaic analysis demonstrates that the Wnt-producing niche derives from intra-ray mesenchyme. Example of a genetic mosaic fin with a single ray containing mCherry-labeled mesenchyme (in magenta) prior to amputation (A) and 4 dpa (B). The amputation plane is indicated with a dashed yellow line. (C, D) A section of the same ray at 4 dpa stained with anti-Dach (grey in single channel image in C, green in D) and anti-mCherry antibodies (red). Red  
405 arrows mark mCherry<sup>+</sup> but Dach<sup>-</sup> blastema cells, the yellow arrows highlight Dach<sup>+</sup>/mCherry<sup>+</sup> niche cells, and white arrows indicate unlabeled osteoblasts. **(E, F)** *Tg(tph1:mCherry)* expression highlights the regenerating intra-ray mesenchyme/niche lineage. Immunostaining of a 4 dpa *Tg(tph1:mCherry)* fin section demonstrates Dach (green) expressing niche cells (yellow arrows) also express *tph1* (red). Red arrows mark proximal Dach<sup>-</sup> *tph1*<sup>+</sup> mesenchyme. **(G-I)**  
410 Mesenchymal-to-niche cell transitions at 4 dpa defined by Dach, Msx, and Snail transcription factors. (G) Like *tph1:mCherry*, Msx expression (red) labels the lineage whether in a differentiated mesenchyme (red arrows) or Dach-expressing (green) progenitor niche (yellow arrows) state. (H, I) Snail expression (red nuclei shown with red arrows) marks intra-ray mesenchyme proximal to the amputation site and blastema cells except distal Dach<sup>+</sup> niche cells  
415 (green nuclei highlighted by green arrows). A small number of Snail<sup>+</sup>/Dach<sup>+</sup> cells (yellow nuclei indicated by yellow arrows) identify cells transitioning between mesenchyme and niche states. Scale bars in all panels are 25 μm. Asterisks denote red blood cells. **(J)** Model of cell state transitions between intra-ray mesenchyme and niche cells during regeneration. Snail<sup>+</sup> mesenchyme cells normally populate the intra-ray space. After amputation, Snail<sup>+</sup> cells  
420 dedifferentiate into Dach<sup>+</sup> niche cells. As ray outgrowth proceeds, niche cells redifferentiate to contribute Snail<sup>+</sup> intra-ray mesenchyme. **(K)** Control of regeneration by a Wnt-producing

dynamic niche pool. Runx2<sup>+</sup> osteoblasts (in pink) are maintained by Wnt (represented by cyan nuclei) secreted by the distal Dach<sup>+</sup>/Wnt<sup>+</sup> niche (green cells with cyan nuclei), which transition (yellow cells) back to Snail<sup>+</sup> mesenchyme (red cells) as regeneration progresses.

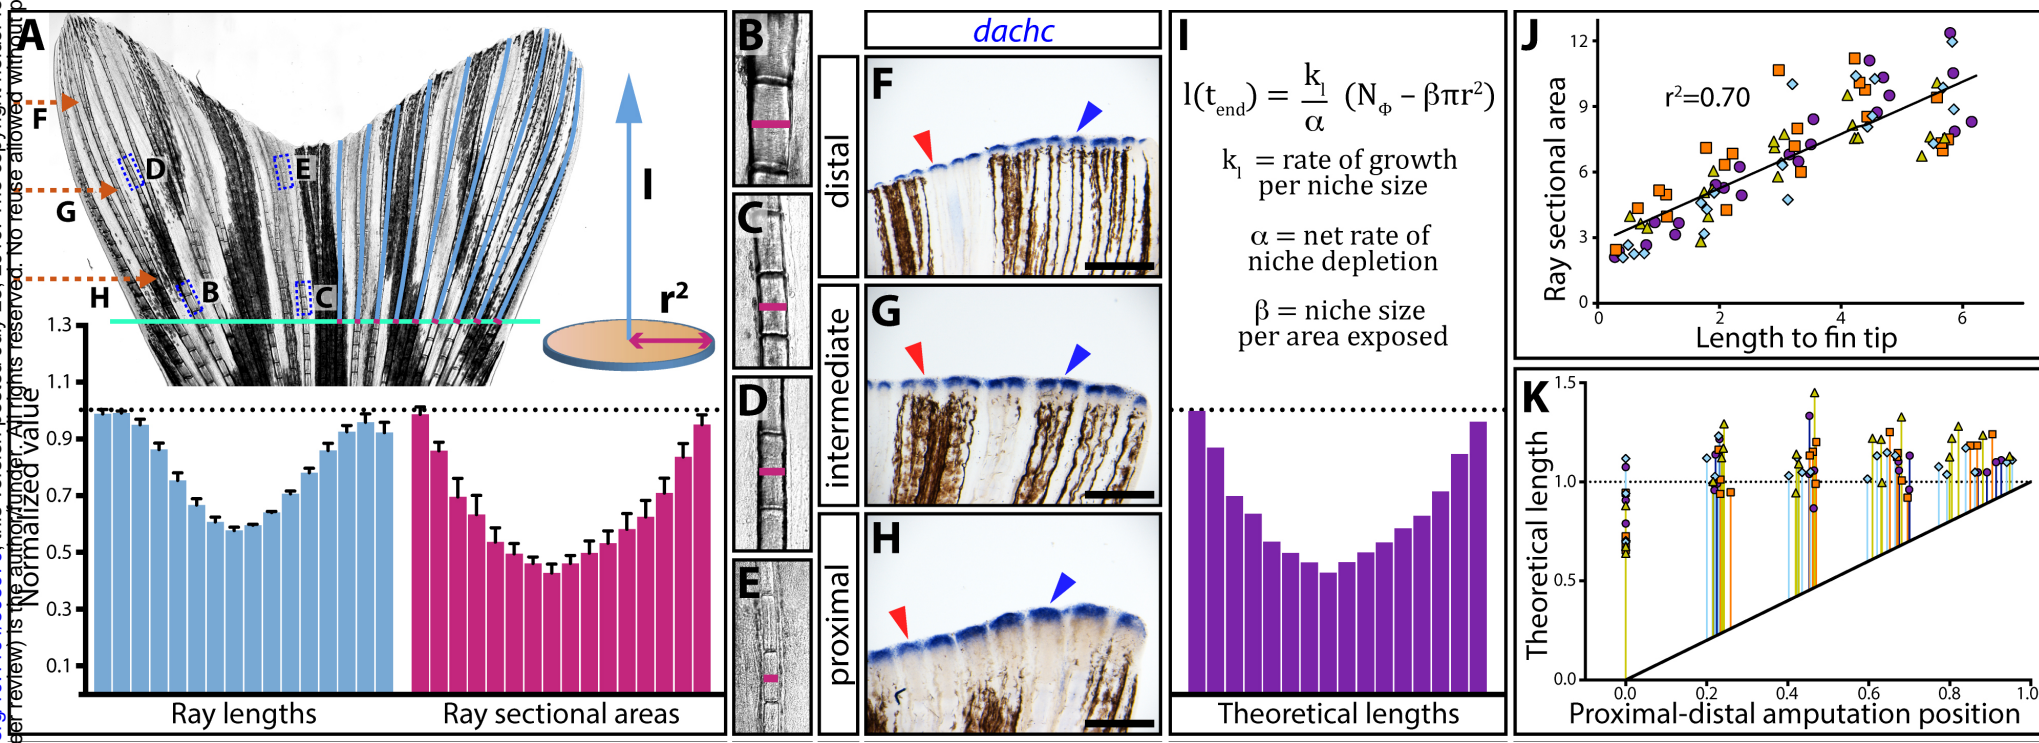

Figure 3. Skeletal geometry-dependent niche generation with progressive niche depletion directs regenerated ray length.

**Figure 3. Skeletal geometry-dependent niche generation with progressive niche depletion directs regenerated ray length.**

(A) A ray's cross-sectional area (or volume) exposed upon amputation (modeled by the square of the radius,  $r^2$ , pink) anticipates the length ( $l$ , light blue) it will regenerate. Plotted normalized measurements for the sixteen medial rays show a tight correlation between ray lengths and ray areas, from/at a hypothetical proximal amputation position (green line). Error bars are one standard deviation (n=4). (B-E) Scale-matched zoom images of the ray segments boxed in the stitched whole fin image in (A), showing differential girth depending on bone position. Pink lines mark ray diameters. (F-H) *dachc* whole mount in situ hybridizations on 72 hpa regenerating fins amputated at distal (F), intermediate (G), or proximal (H) positions. As anticipated by the model, *dachc* expression, representing the amount of niche generated, correlates with regenerative demand. Scale bars are 500  $\mu\text{m}$ . (I) A mathematical model equation represents the length of a given ray at the end of regeneration ( $l(t_{end})$ ) as a function of the radius of the ray at the amputation position. Three regulatory parameters ( $k_i$ ,  $\alpha$ , and  $\beta$ ) must be tuned precisely to restore the original length, but no molecular positional information is required. The plot shows how the formula theoretically restores normalized ray lengths using actual measured radius values at the hypothetical amputation point (green line). (J) Scatter plot showing a linear relationship between ray sectional area and ray length from any measured position along the entire proximal-distal (P-D) fin axis. Each point represents 5 or 6 measured points from each of rays 3, 4, 15, 16 from four animals. Matching data point colors/shapes indicates a given ray. (K) The mathematical model predicts regenerated length (normalized = 1) regardless of amputation position. Each data point shows the theoretical length derived from a given ray's radius

measurements at one P-D position. The colored vertical lines represent anticipated growth from the amputation position (therefore, starting from the black diagonal line).

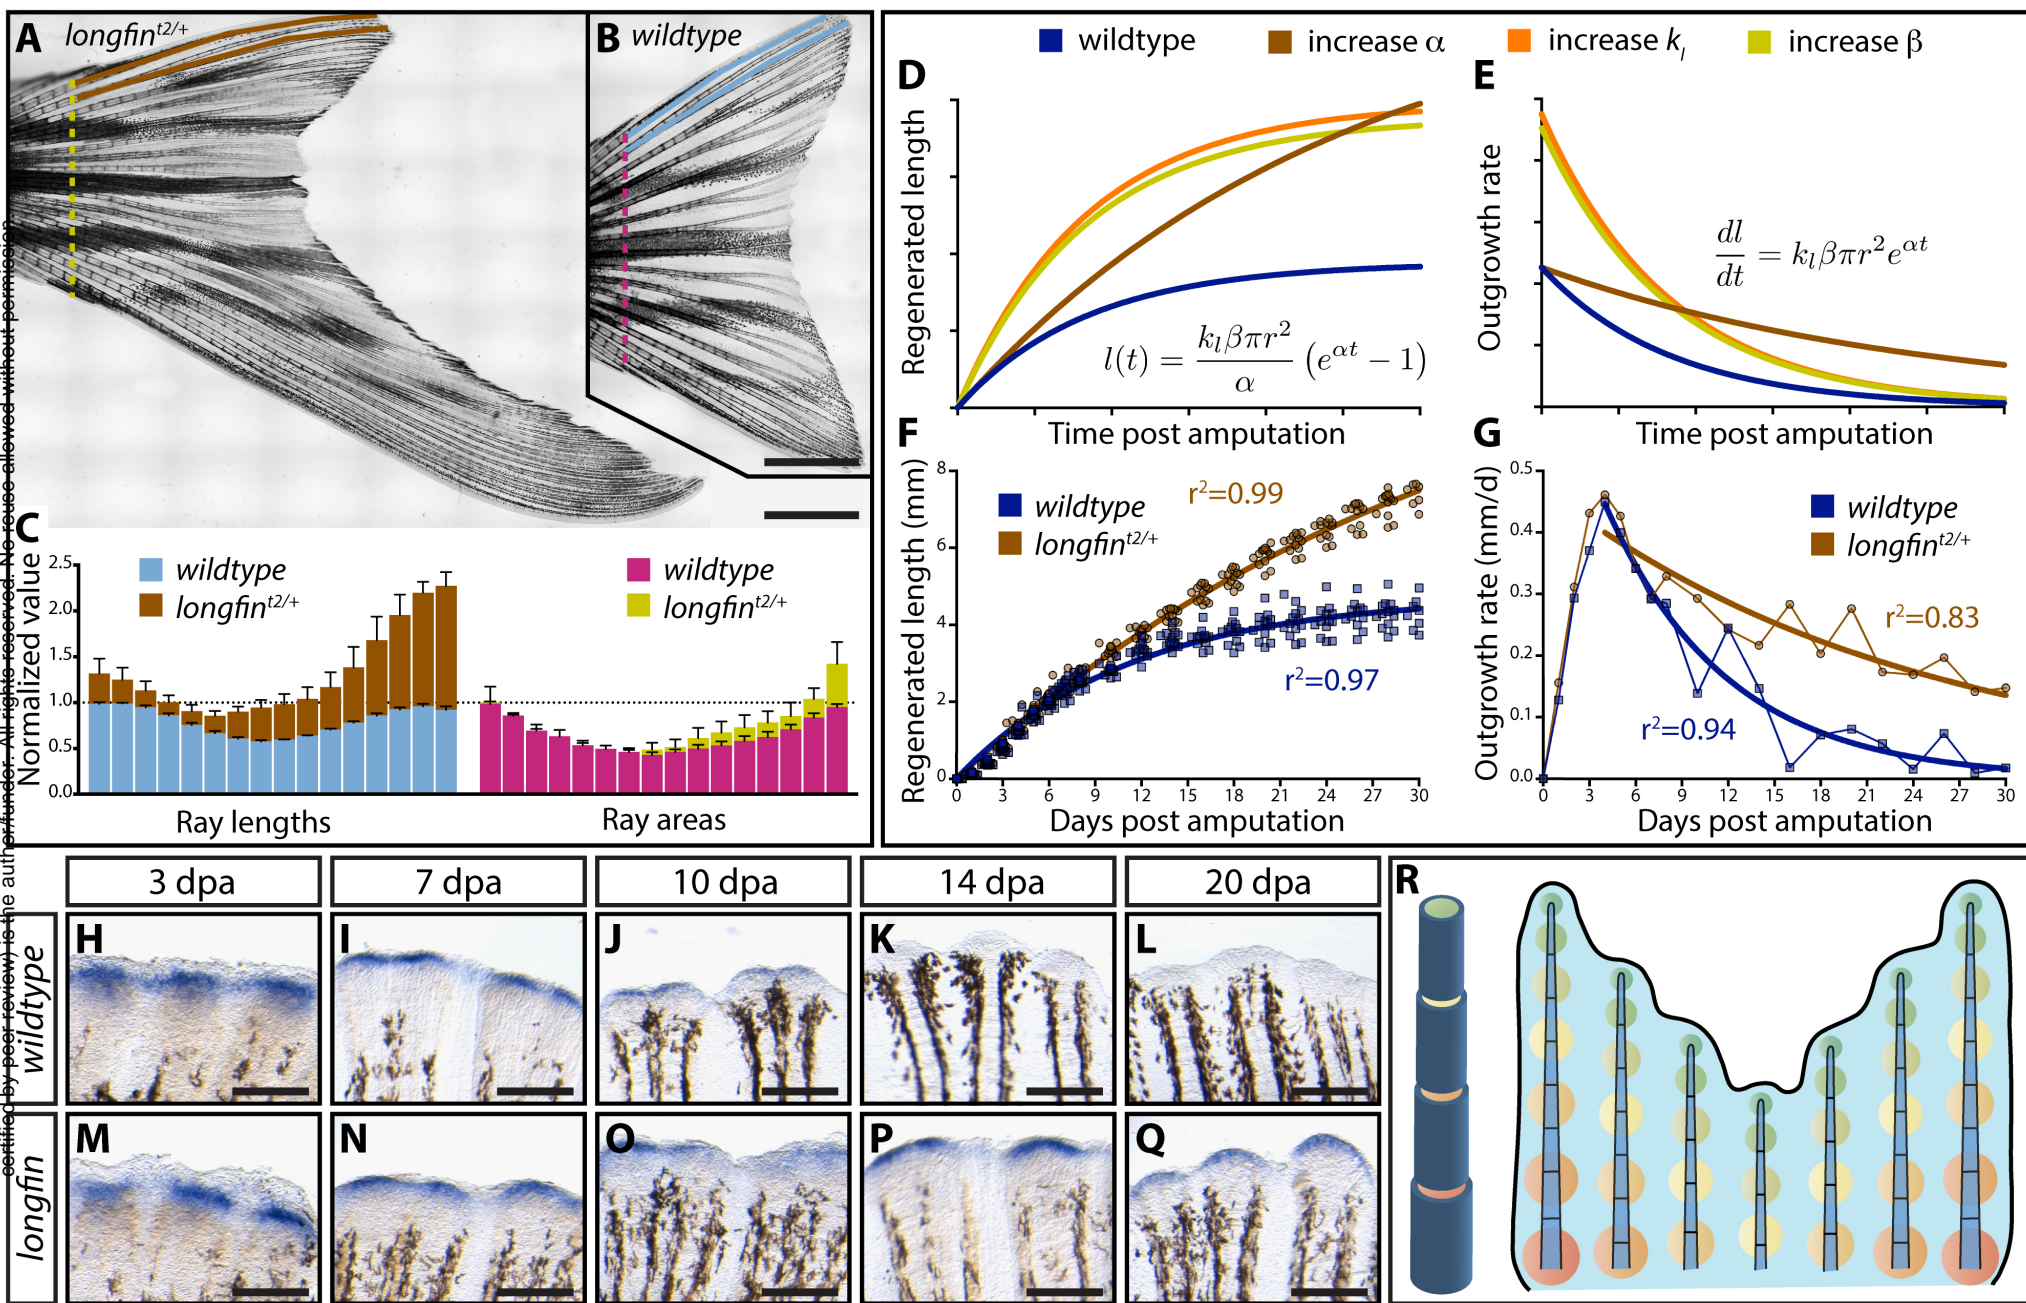

**Figure 4.** *longfin* fish regenerate exceptionally long fins due to a broken niche countdown timer, supporting a transpositional scaling model of self-restoring fin geometry.



**Figure 4. *longfin* fish regenerate exceptionally long fins due to a broken niche countdown timer, supporting a transpositional scaling model of self-restoring fin geometry.**

(A, B) Stitched differential interference contrast images show the dramatically overgrown caudal fins of *longfin*<sup>t2/+</sup> fish. Ray length and radius measurements taken at/from a proximal position denoted by colored dashed lines (brown/yellow=*longfin*<sup>t2/+</sup>, light blue/pink=wildtype). Scale bars are 2 mm. (C) Normalized caudal fin ray lengths (left) and transverse areas (from *radius*<sup>2</sup> measurements, right) for clutchmate wildtype and *longfin*<sup>t2/+</sup> fish. *longfin* fish have nearly the same ray areas as wildtype fish in spite of their much longer fin rays. This suggests one of the regulatory parameters is altered in *longfin* mutants. (D) Theoretical regeneration growth and (E) growth rate curves derived from the transpositional scaling equation have distinct shapes depending if niche response ( $k_i$ ) or niche generation ( $\beta$ ) vs. niche perdurance ( $\alpha$ ) parameters are increased. The actual growth (F) and growth rate (G) of regenerating *longfin*<sup>t2/+</sup> caudal fins match expectations if niche perdurance ( $\alpha$ ) – the “countdown timer” – is disrupted. The initial and maximum growth rate is unaltered but the growth rate progressively decreases at a much slower rate. Curves show actual data fit to the modeling equations (r square goodness of fit values are shown). All data points ( $\geq 12$  fish per time) are shown in (F); points in (G) are mean values. (H-Q) Whole mount in situ hybridization for the *dachc* niche marker through a time course post-caudal fin amputation for wildtype and *longfin*<sup>t2/+</sup> fish. As the modeling predicts, *longfin*<sup>t2/+</sup> fish generate a normal-sized niche after fin resection but the cells fail to deplete in a timely manner. Scale bars are 200  $\mu\text{m}$ . (R) A “transpositional scaling” model explains how positional information stored in skeletal geometry alone combined with a state transitioning and depleting niche population directs the fin to regenerate back to the original size and shape. A wider amputated ray produces more niche cells from its intra-ray mesenchyme. Niche cells

deplete at a constant rate through their re-differentiation to mesenchyme. The diminishing niche  
475 maintains a progressively smaller bone progenitor pool, regenerating a tapered ray and inherently  
restoring the geometry primed for future injury responses.

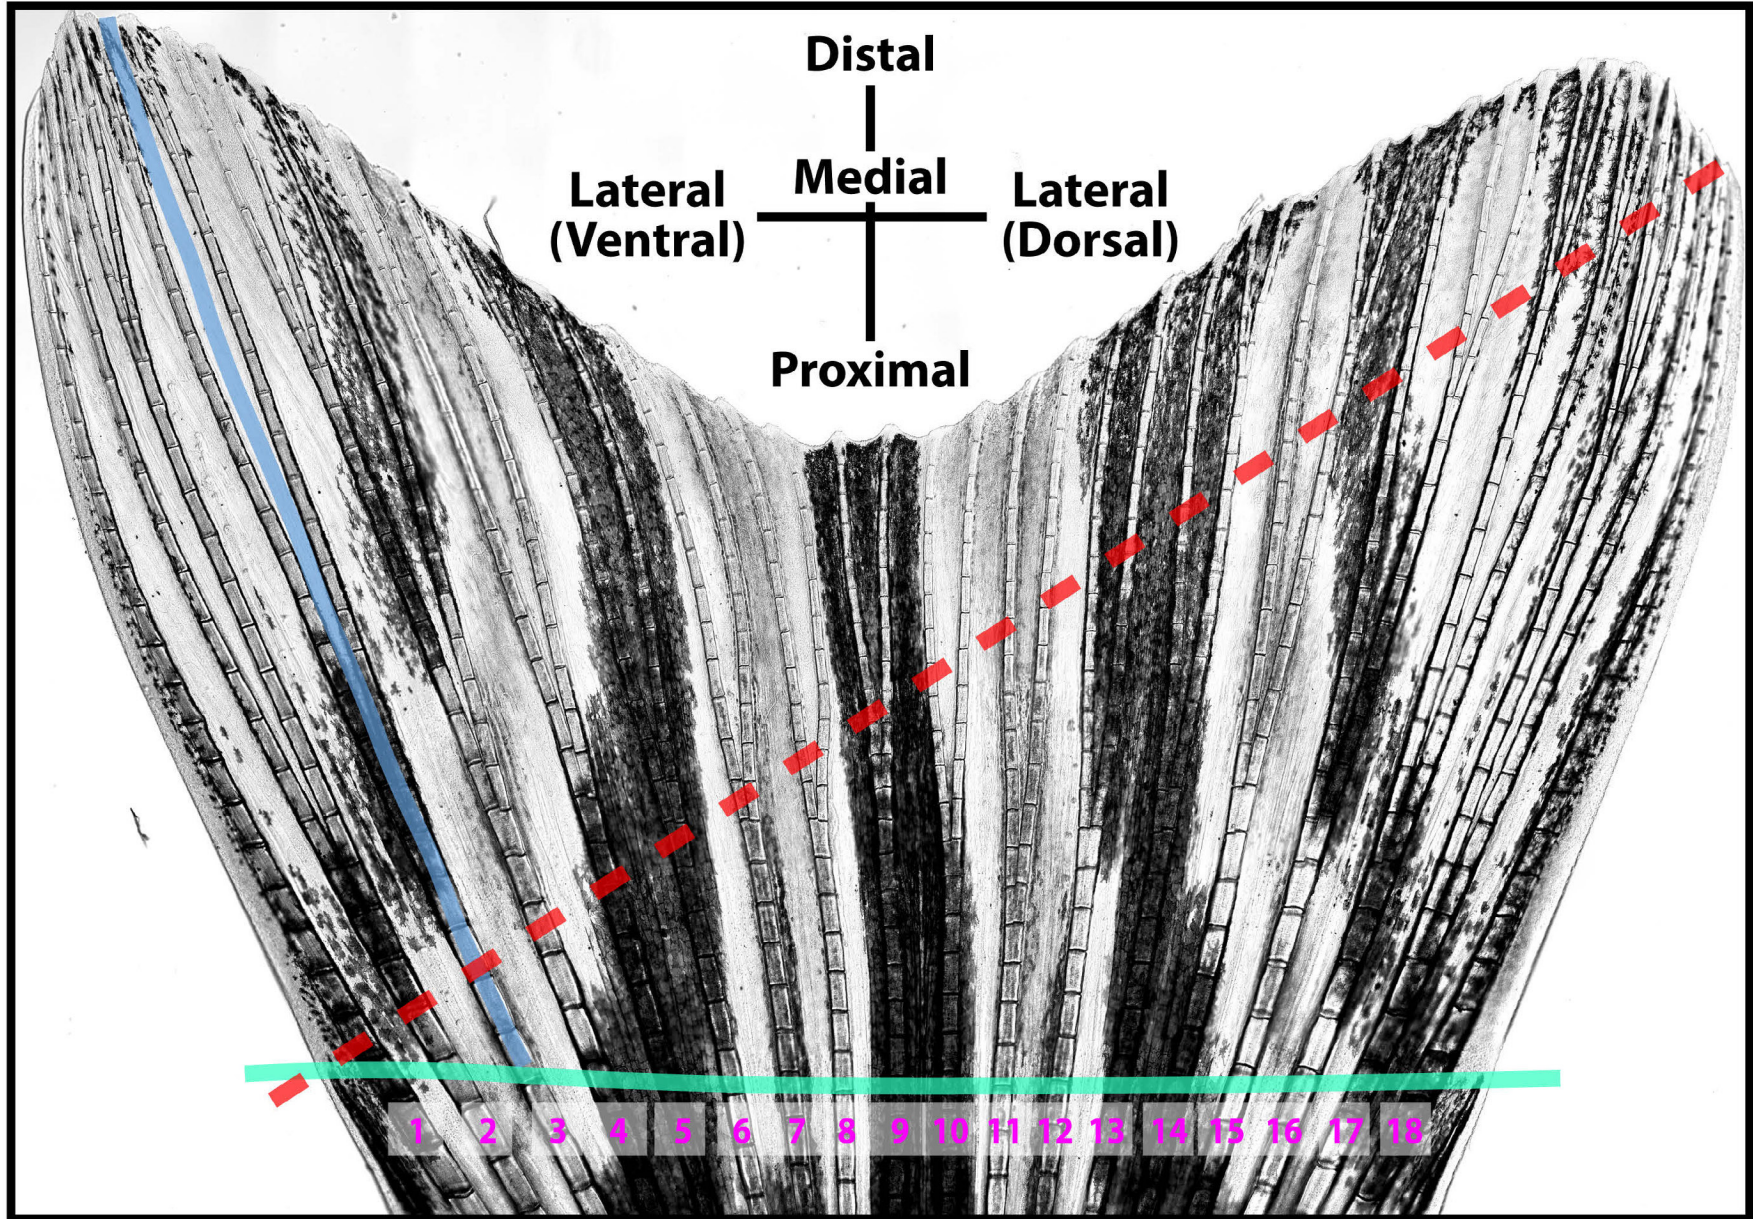

Extended Data Figure 1

**Extended Data Figure 1. A zebrafish caudal fin showing amputation positions and**  
480 **orientation/numbering conventions.**

A high resolution, stitched differential interference contrast (DIC) image of an uninjured adult caudal fin. The green line shows the standard proximal-distal amputation plane spanning between the tips of the un-numbered, truncated lateral “mini-rays”. Diagonal fin amputations follow the dashed red line, starting from the tip of the ventral-most “mini-ray”, passing through  
485 ray 16’s second branch-point, and continuing straight through the dorsal edge. Length measurements (blue line) are from a real or theoretical amputation position to the fin’s tip. To accommodate branching, the line is drawn directly in between branches of a mother ray. The terms “lateral” and “medial” distinguish ray position relative to a fin’s center or either edge.

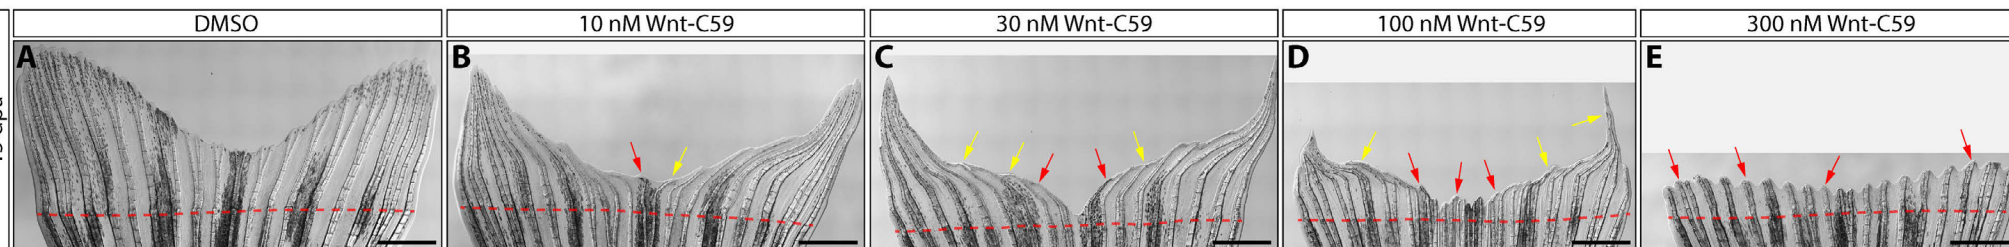

**Extended Data Figure 2**

**Extended Data Figure 2. Wnt production correlates with regenerative “demand”.**

**(A-E)** Stitched differential interference contrast (DIC) images of regenerated caudal fins 15 days post amputation (dpa) with exposure to DMSO (A) or indicated concentrations of the Wnt-secretion inhibitor Wnt-C59 (B-E). Small molecule exposures began at 4 dpa until imaging at 15  
495 dpa. Yellow and red arrows point to regions with reduced or failed regeneration after drug addition, respectively. The amputation plane is indicated with a dashed red line. Scale bars are 1 mm.

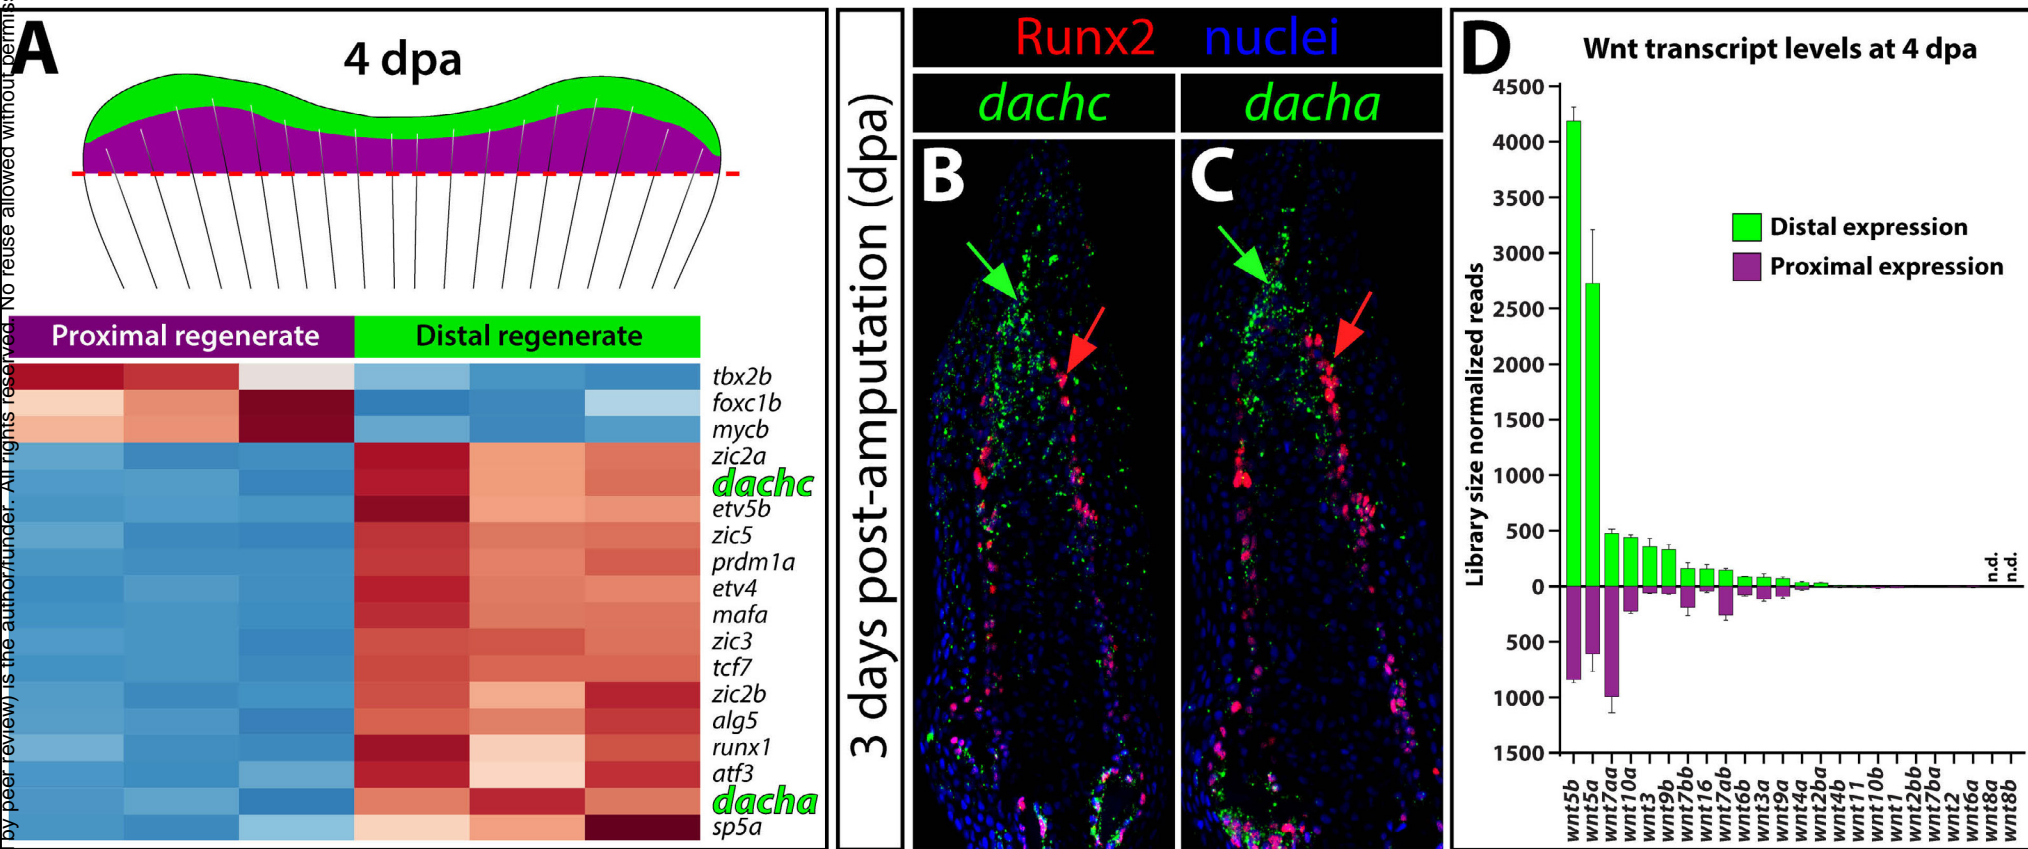

Extended Data Figure 3

**Extended Data Figure 3. *dacha* and *dachc* expression defines the distal Wnt-producing niche.**

500

(A) RNA-Seq analysis comparing distal Wnt-expressing vs. proximal differentiating tissue from 4 day post-amputation (dpa) regenerating fin tissue. The heat map illustrates relative enrichment (red = higher, blue = lower) of all the differentially expressed transcriptional regulators ( $p < 0.05$  and at least 3-fold difference) for each replicate. (B-C) In situ hybridization (in green) for *dachc*

505

(B) and *dacha* (C) mRNAs, combined with immunostaining for Runx2 (red) on 3 dpa fin sections. Hoechst-stained nuclei are blue. Red arrows indicate Runx2-expressing osteoblasts that lack *dacha/c* expression. Green arrows point to the *dacha/c*-expressing distal niche. (D) Bar

graph showing the library size-normalized transcript counts of all 24 zebrafish *wnt* genes in distal and proximal 4 dpa fin regenerate tissue. The genes are ordered by descending expression levels.

510

*wnt5b* and *wnt5a* have the highest distal transcript levels and are distally enriched. Means of the three replicate pooled samples are shown. Error bars show one standard deviation.



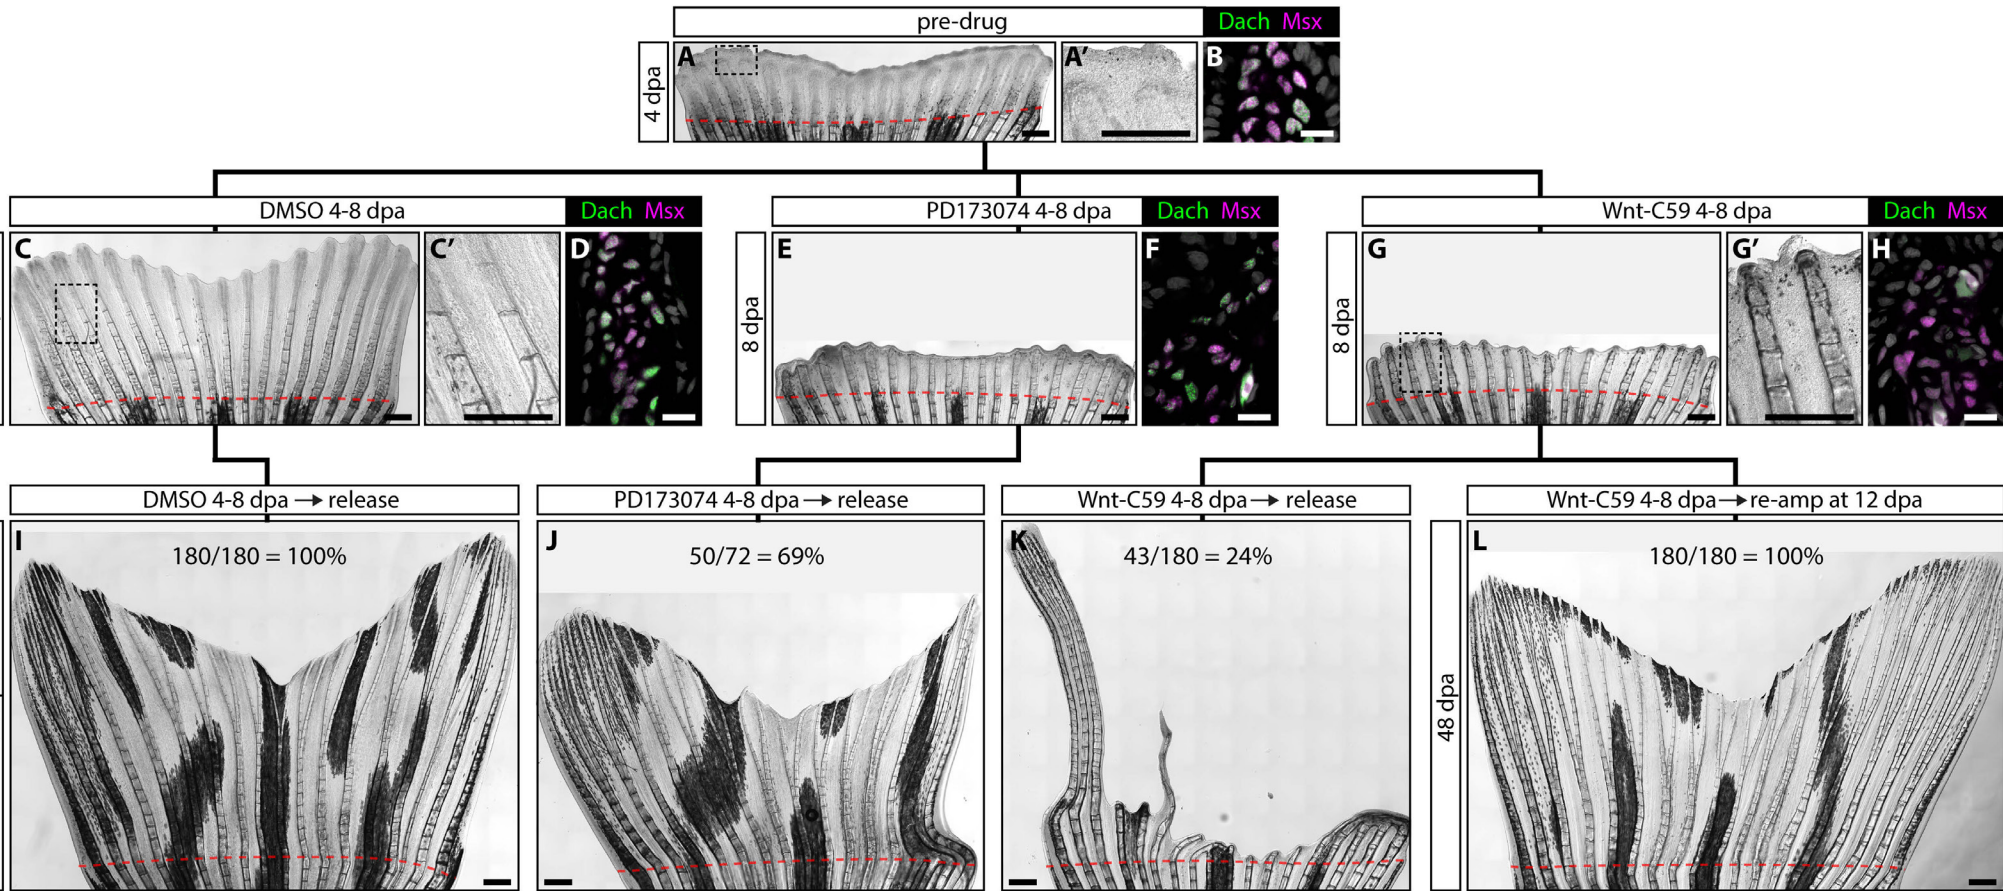

Extended Data Figure 4

**Extended Data Figure 4. Inhibition of Wnt signaling depletes the Dach<sup>+</sup> niche and irreversibly blocks regeneration.**

515 The black lines connecting figure panels establish a tree diagram showing the experimental workflow. Top row: caudal fins from clutchmate animals are resected and allowed to regenerate through 4 dpa. Middle row: At 4 dpa, animals are treated with DMSO, the FGFRi inhibitor PD173074, or the Wnt secretion inhibitor Wnt-C59 until 8 dpa. Bottom row: Animals are then transferred to fish water and allowed to completely regenerate. For (L), fins are re-amputated at

520 12 dpa proximal to the original amputation site. Whole mount fin images use stitched differential interference contrast (DIC) microscopy. **(A)** A representative fin at 4 dpa. The region bound by the dashed box is shown at high magnification (**A'**) to emphasize how distal tissue is undifferentiated. **(B)** A distal regenerate section from a 4 dpa fin immunostained with Dach (green) and Msx (magenta) antibodies (**B**). Niche cells express both transcription factors. **(C, C',**

525 **E, G, G')** 8 dpa regenerated fins from DMSO (**C, C'**), PD173074 (**E**), and Wnt-C59 (**G, G'**) exposed animals. FGF or Wnt inhibition prevents outgrowth past the 4 dpa time of drug addition. However, Wnt is not required for bone differentiation or joint formation (compare **G'** with **A'**). **(H-I)** 8 dpa sections immunostained with Dach (green) and Msx (magenta) antibodies. Dach-expressing niche cells persist upon FGFR inhibition but are lost when Wnt production is

530 blocked. **(I-K)** Fin images at 60 dpa after treatment from 4-8 dpa with DMSO (**I**), PD173074 (**J**), or Wnt-C59 (**K**). Unlike FGFR inhibition, Wnt inhibition irreversibly blocks outgrowth. **(L)** A Wnt-C59 treated animal (from 4-8 dpa) subjected to a secondary amputation at 12 dpa and allowed to regenerate until 48 dpa. For (I-L), the number of rays that regenerated normally is shown for each treatment (n = 10 fish for each condition). A dashed red line indicates the

535 amputation plane. Scale bars are 500  $\mu\text{m}$  for whole mount images and 25  $\mu\text{m}$  for immunostained sections.

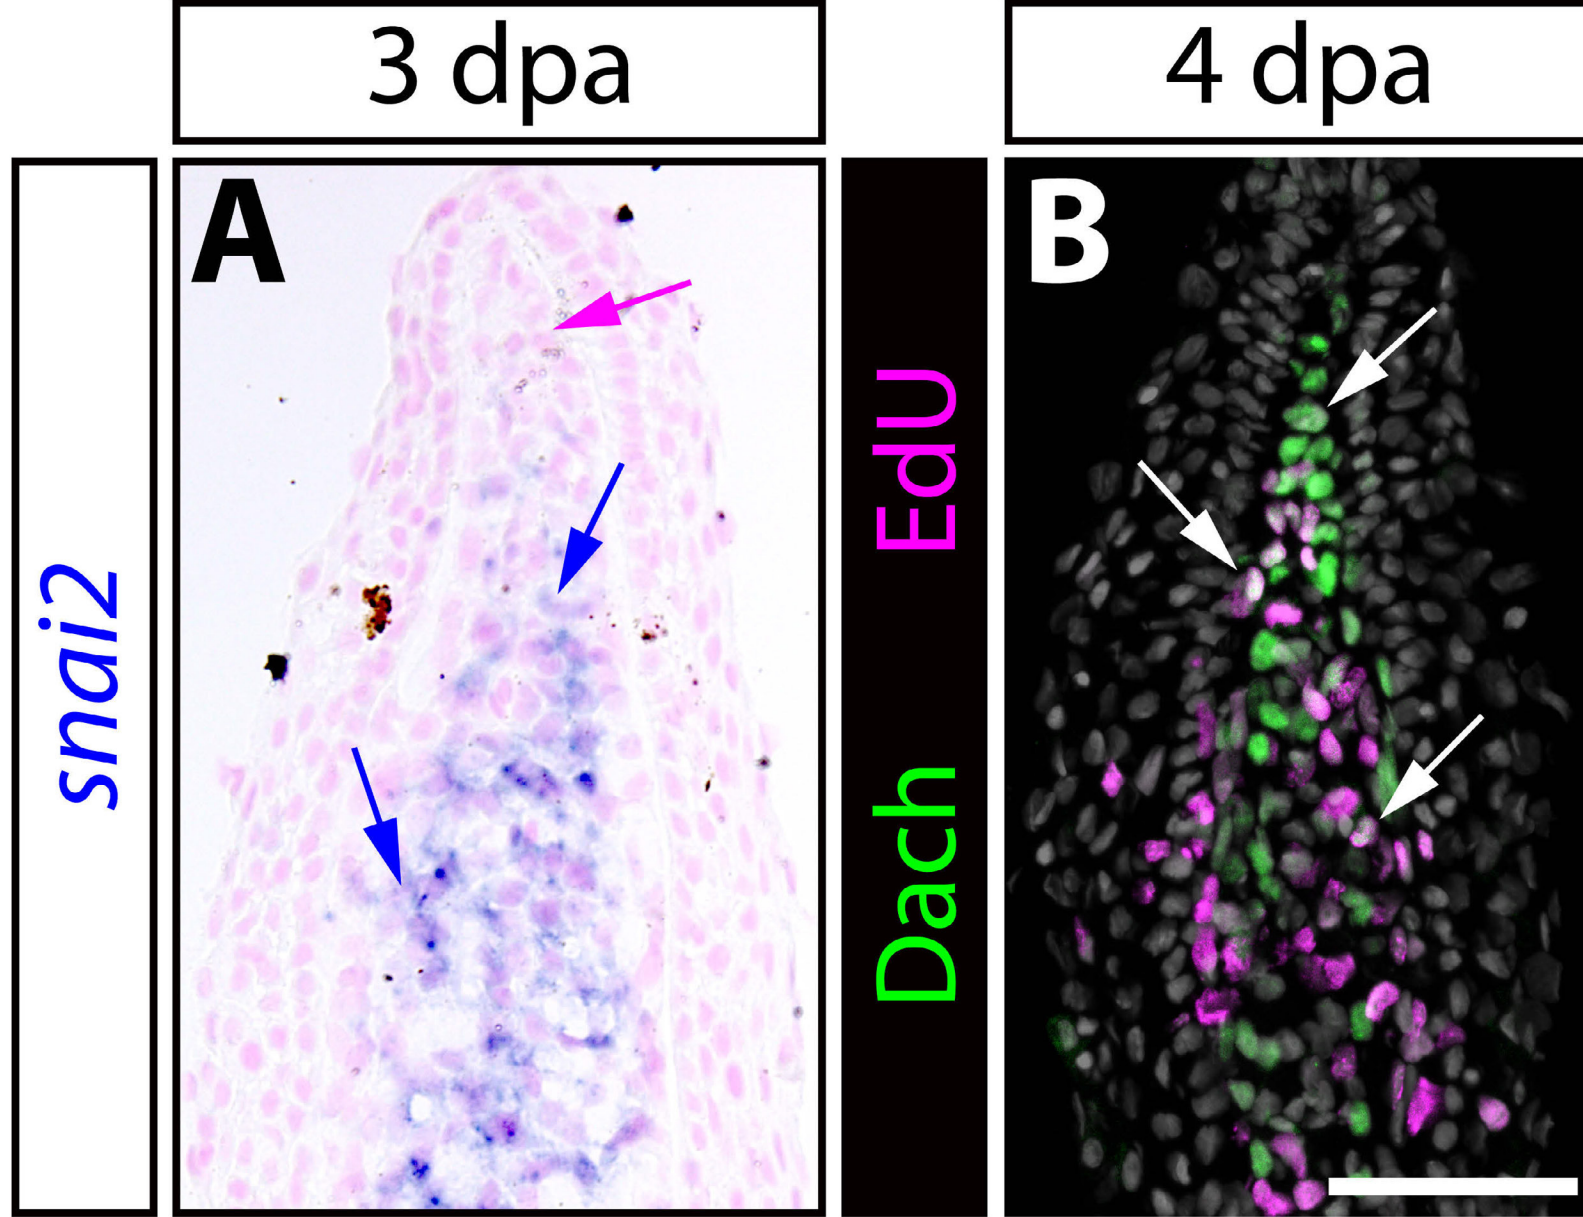

Extended Data Figure 5

**Extended Data Figure 5. Intra-ray mesenchymal cells down-regulate *snai2* when transitioning to a Dach<sup>+</sup> niche state that remains proliferative.**

540 (A) Visualization of *snai2* mRNA (in blue) by in situ hybridization on a 3 dpa fin section. The tissue is counterstained with Nuclear Fast Red. Blue arrows indicate *snai2*-expressing blastema mesenchyme. The magenta arrow highlights the *snai2*-negative niche. (B) Paraffin section of a 4 dpa regenerating caudal fin stained for EdU incorporation (four hour EdU exposure; magenta) and Dachshund (Dach; green) expression. Nuclei are in grey. Scale bar is 50  $\mu$ m. White arrows

545 denote Edu<sup>+</sup>/Dach<sup>+</sup> cells found throughout the niche population.

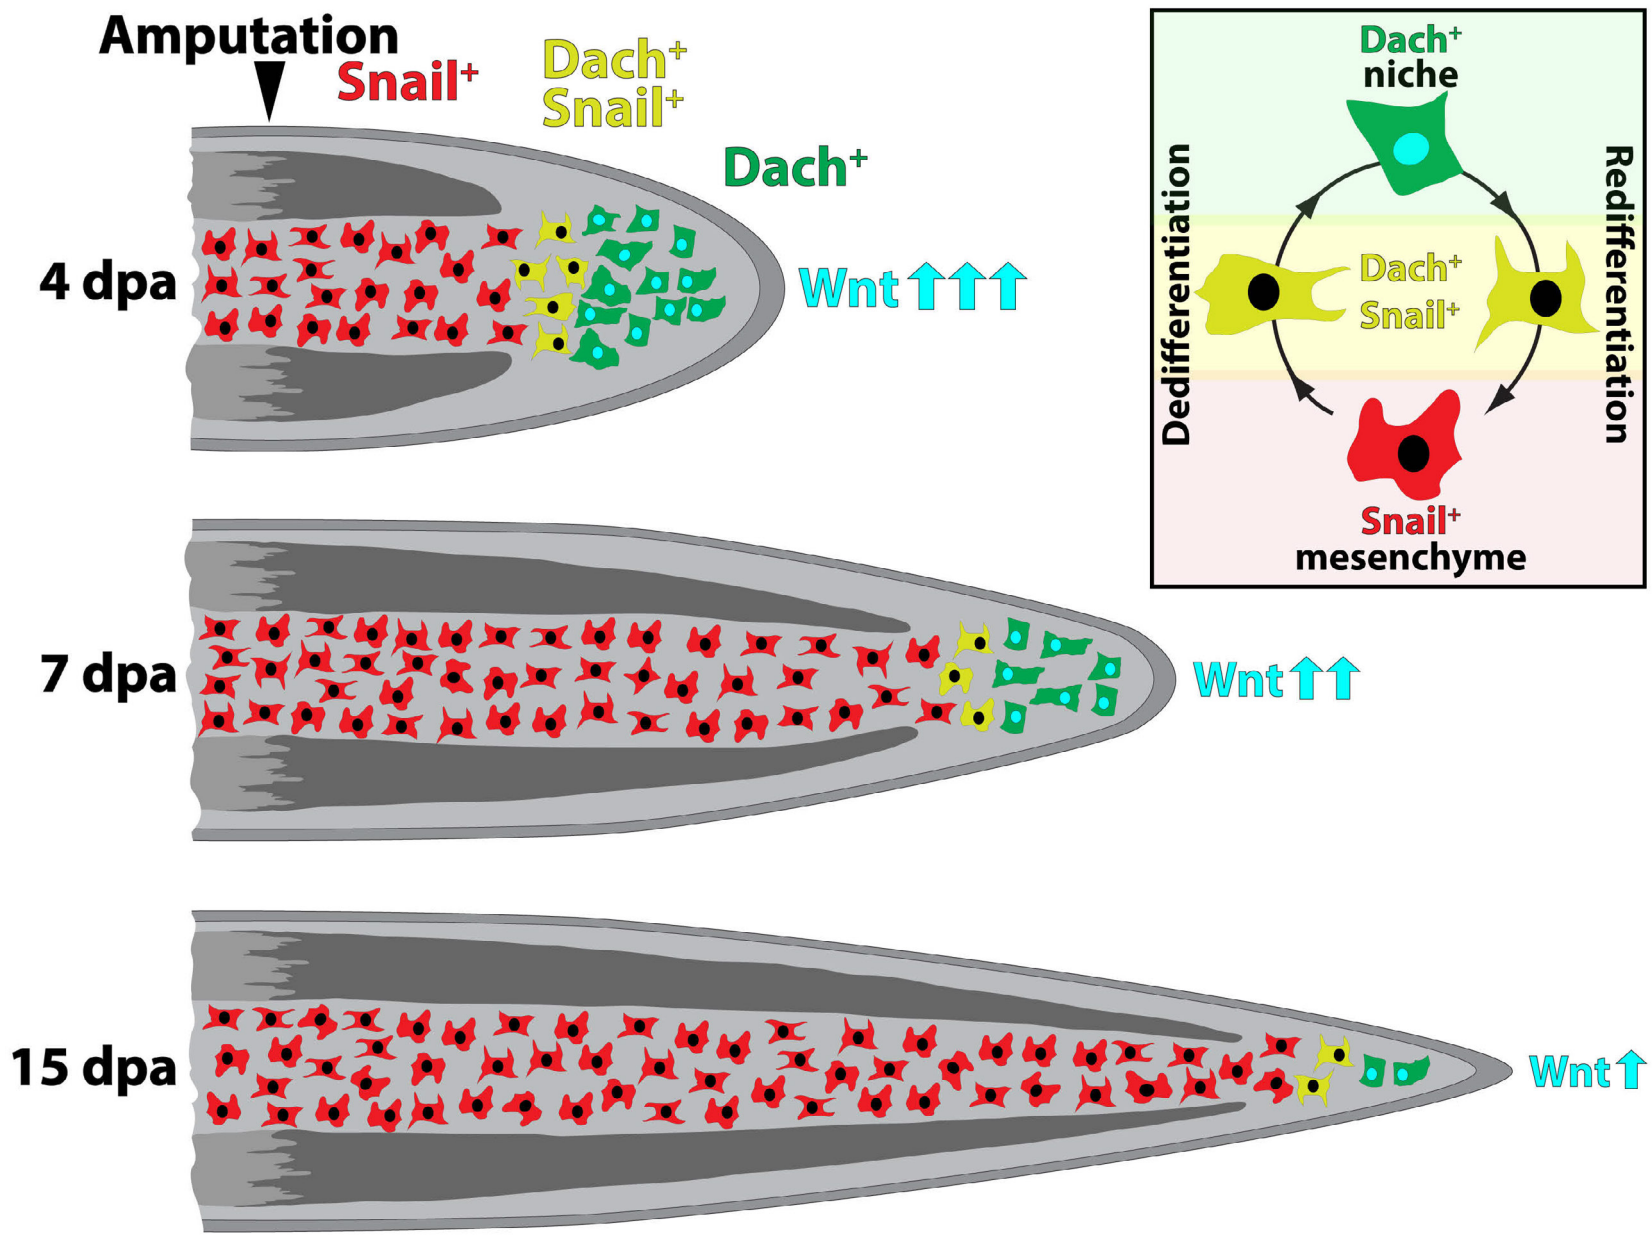

Extended Data Figure 6

**Extended Data Figure 6. Graphic depicting the progressive depletion of the Wnt-producing, Dach-defined niche population during fin regeneration.**

Dach<sup>+</sup> niche cells originate from Snail-expressing intraray mesenchyme released into the  
550 forming blastema upon injury. The size of the niche population, and therefore Wnt levels,  
decreases as the fin regenerates as niche cells transition back into a Snail<sup>+</sup> mesenchymal state.

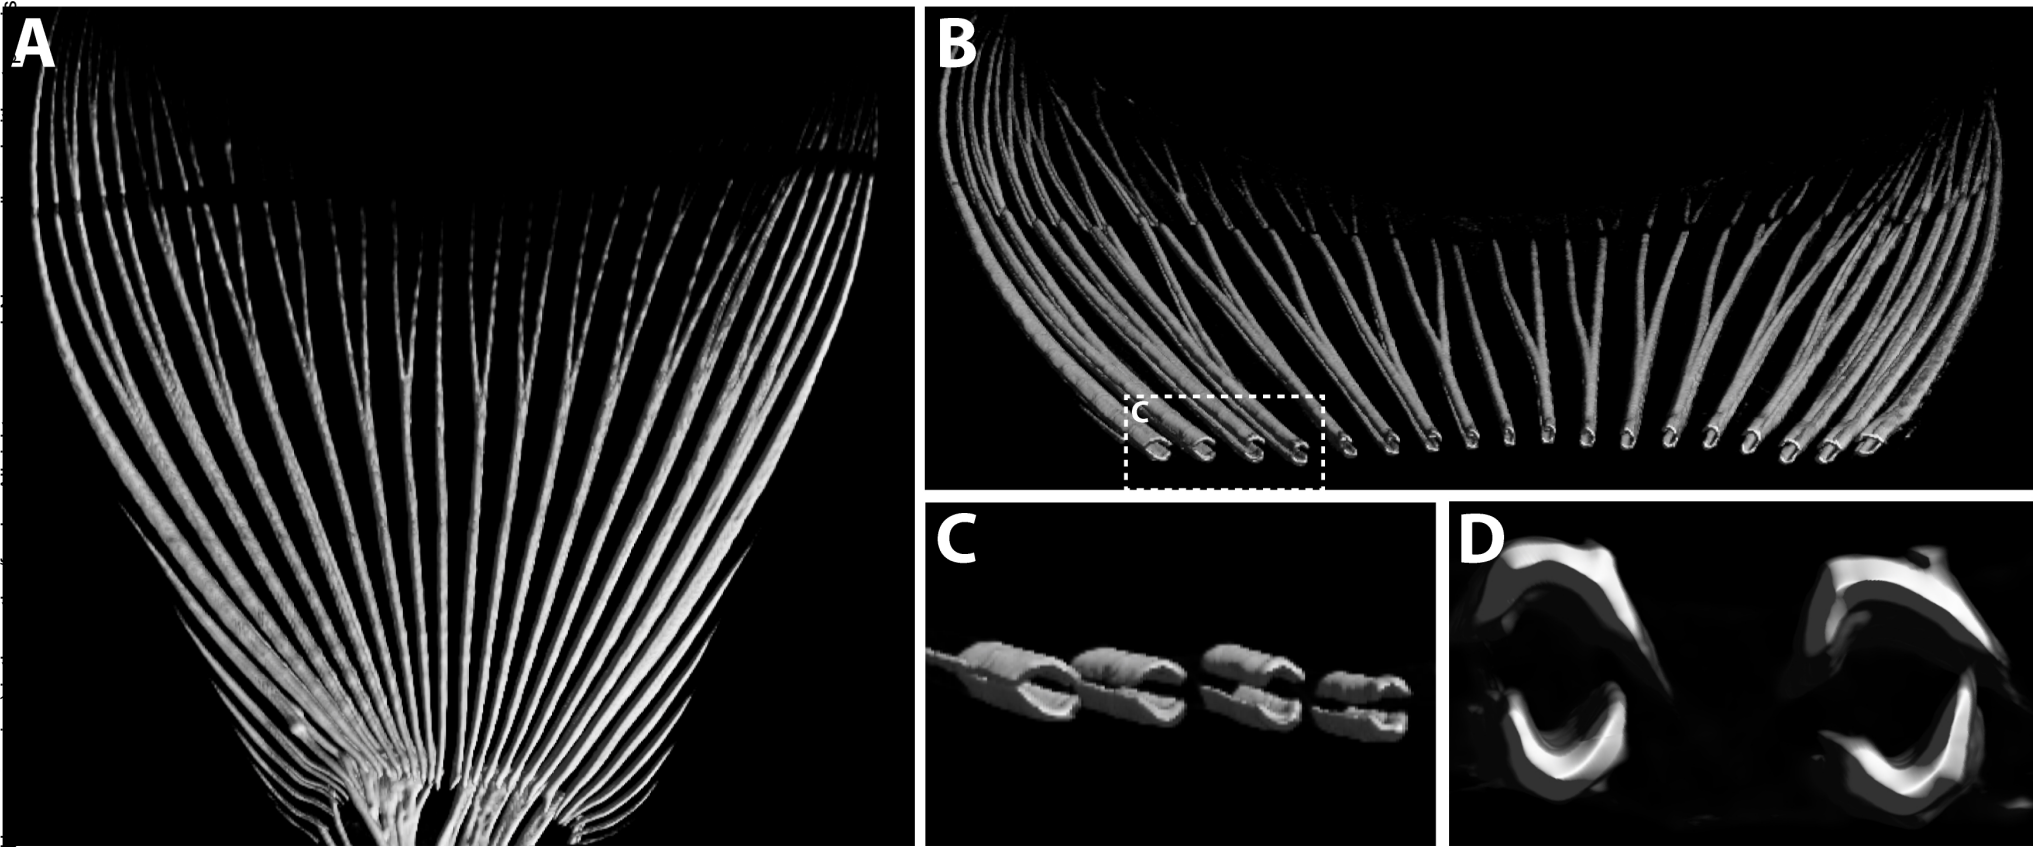

Extended Data Figure 7



**Extended Data Figure 7. Micro-CT analysis shows bony rays across the caudal fin are variably sized, tapered, and cylindrical. (A-C)** 3-D micro-computed tomography images of an adult zebrafish caudal fin highlighting its (A) bony ray skeleton, (B) differentially sized and tapering rays, (C) the cylindrical shape of the intra-ray space between hemi-rays and (D) its approximately circular cross-sectional area.

*dachc*

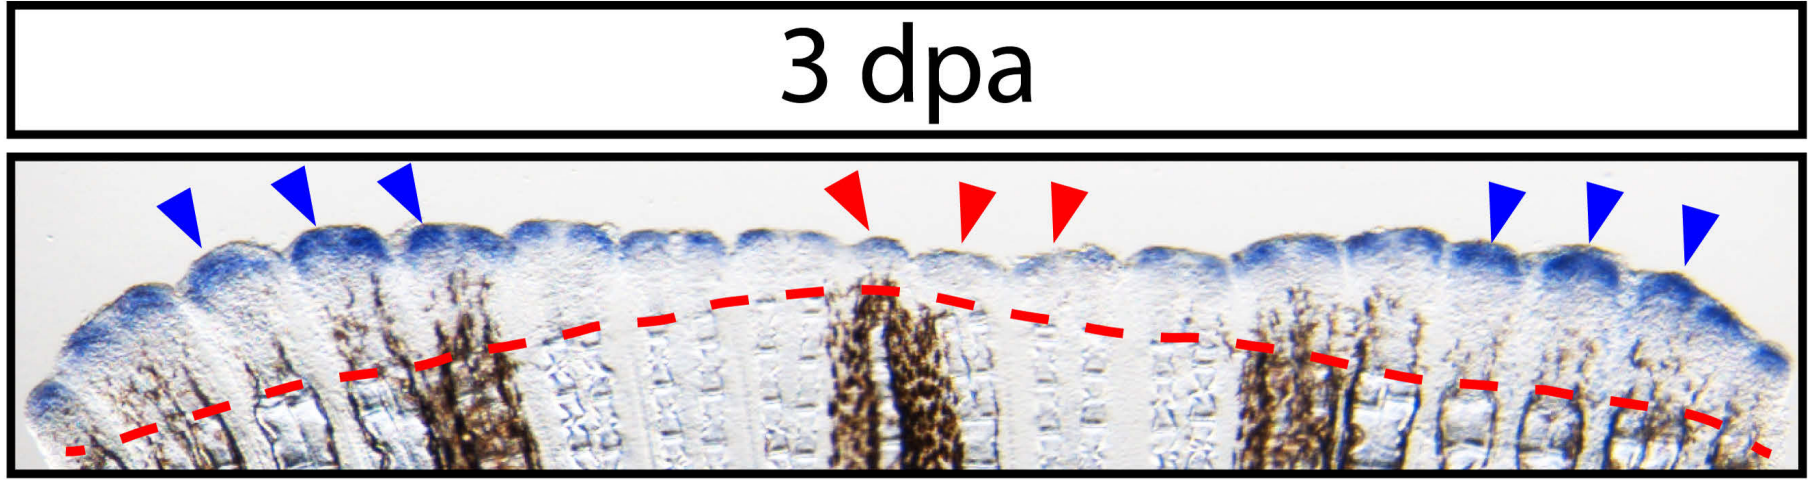

Extended Data Figure 8

**Extended Data Figure 8. Differential niche production across the dorsal-ventral axis during**  
560 **fin regeneration.**

Whole mount in situ hybridization on a 3 dpa fin using a *dachc* probe to visualize distal niche cells (in blue). Blue arrowheads indicate lateral fin regions with pronounced and broad *dachc* expression indicative of robust niche cell pools. Red arrowheads point to medial fin tissue with modest *dachc* signal due to relatively small niche cell populations. The dashed red line marks the  
565 amputation plane.

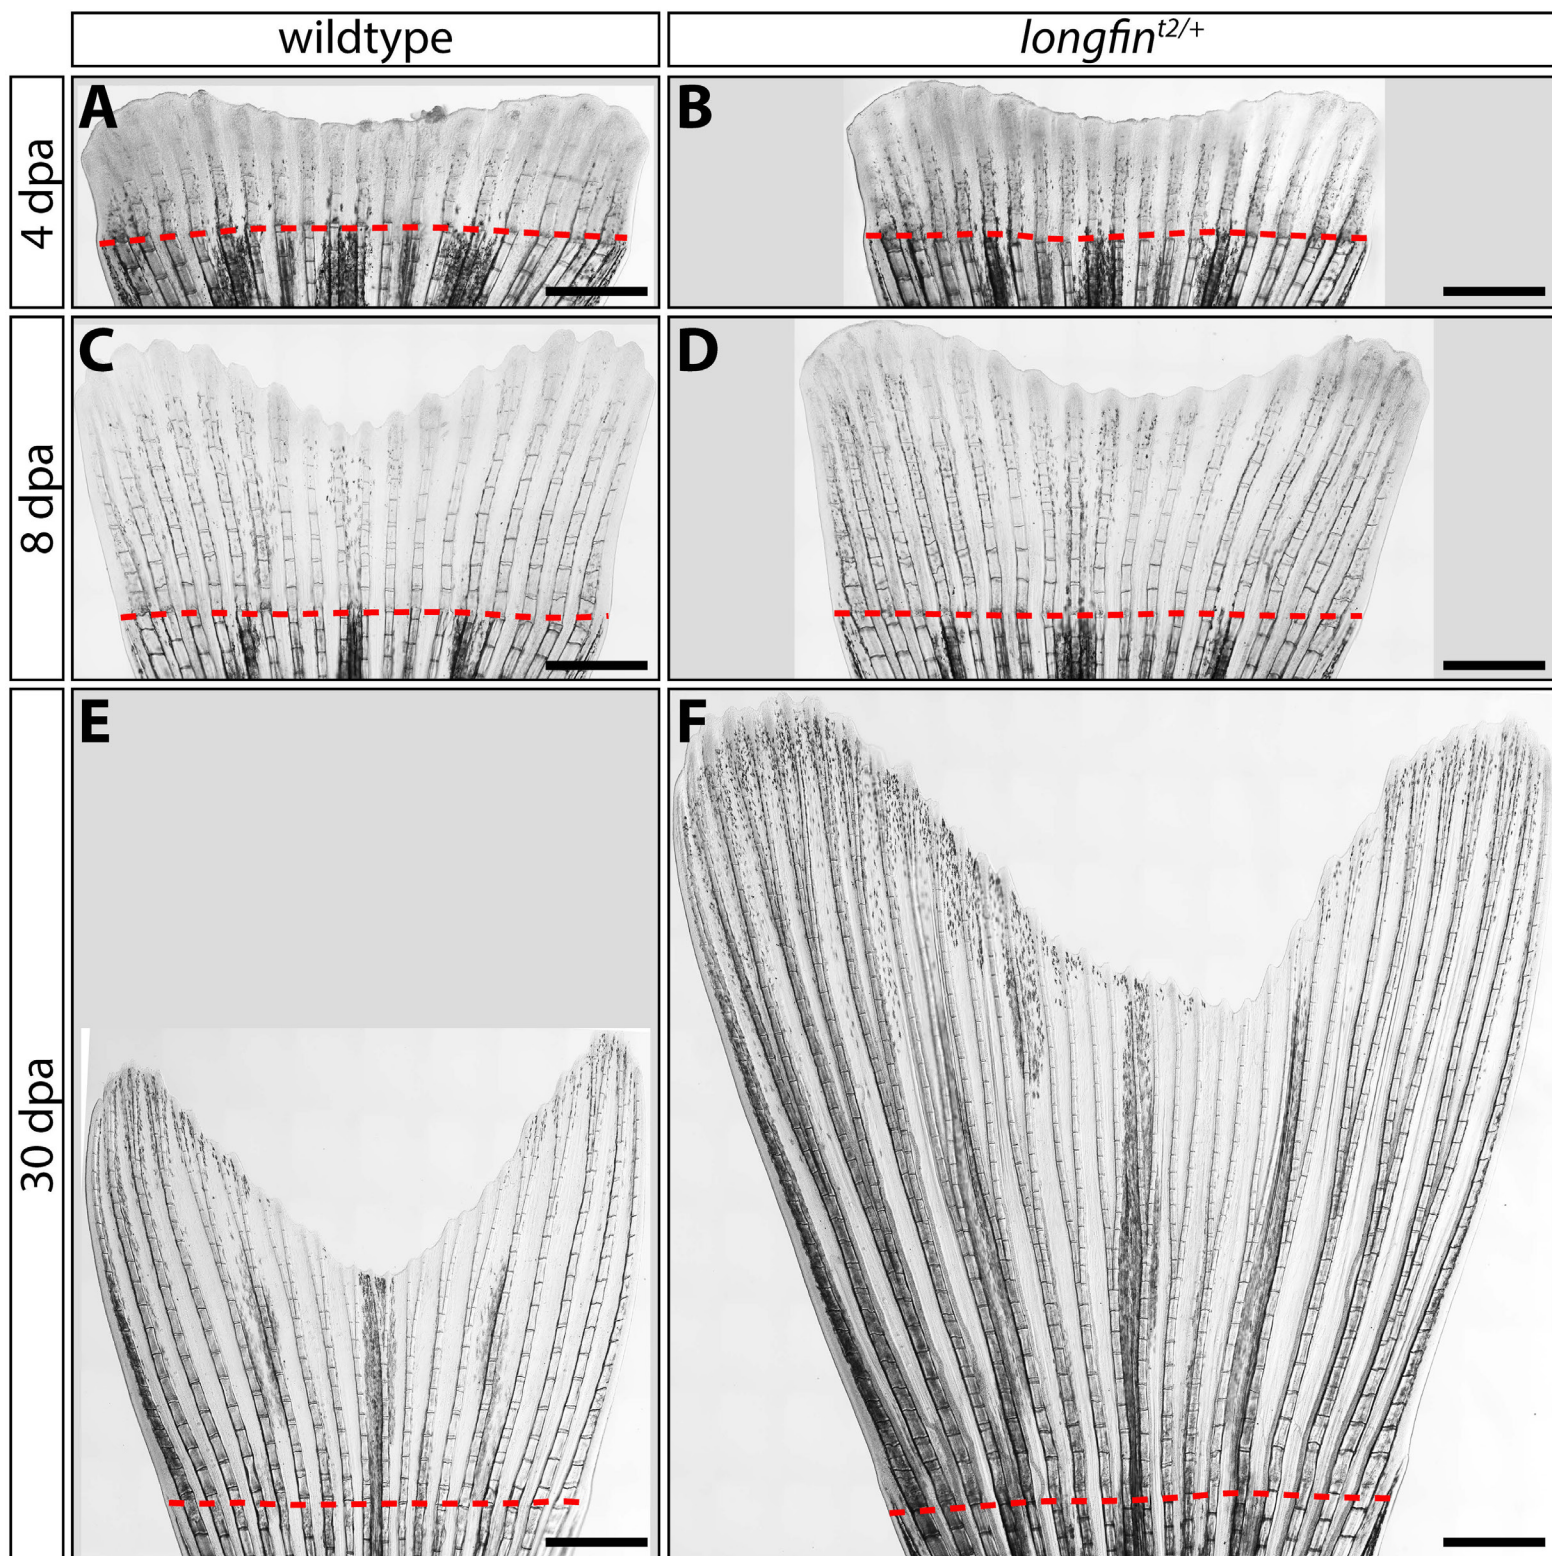

Extended Data Figure 9

**Extended Data Figure 9. Regenerative outgrowth of *longfin*<sup>t2/+</sup> caudal fins fails to decelerate.**

570 (A-F) Stitched differential interference contrast (DIC) microscope images of caudal fins from clutchmate wildtype and *longfin*<sup>t2/+</sup> animals at the indicated day post amputation (dpa). Outgrowth is similar through 8 dpa but persists in *longfin*<sup>t2/+</sup> fish, leading to exceptionally long fins by 30 dpa. Quantitative data for the entire time course ( $n \geq 12$ ) is shown in Fig. 4. Dashed red lines highlight amputation planes. Scale bars represent 1 mm.

575

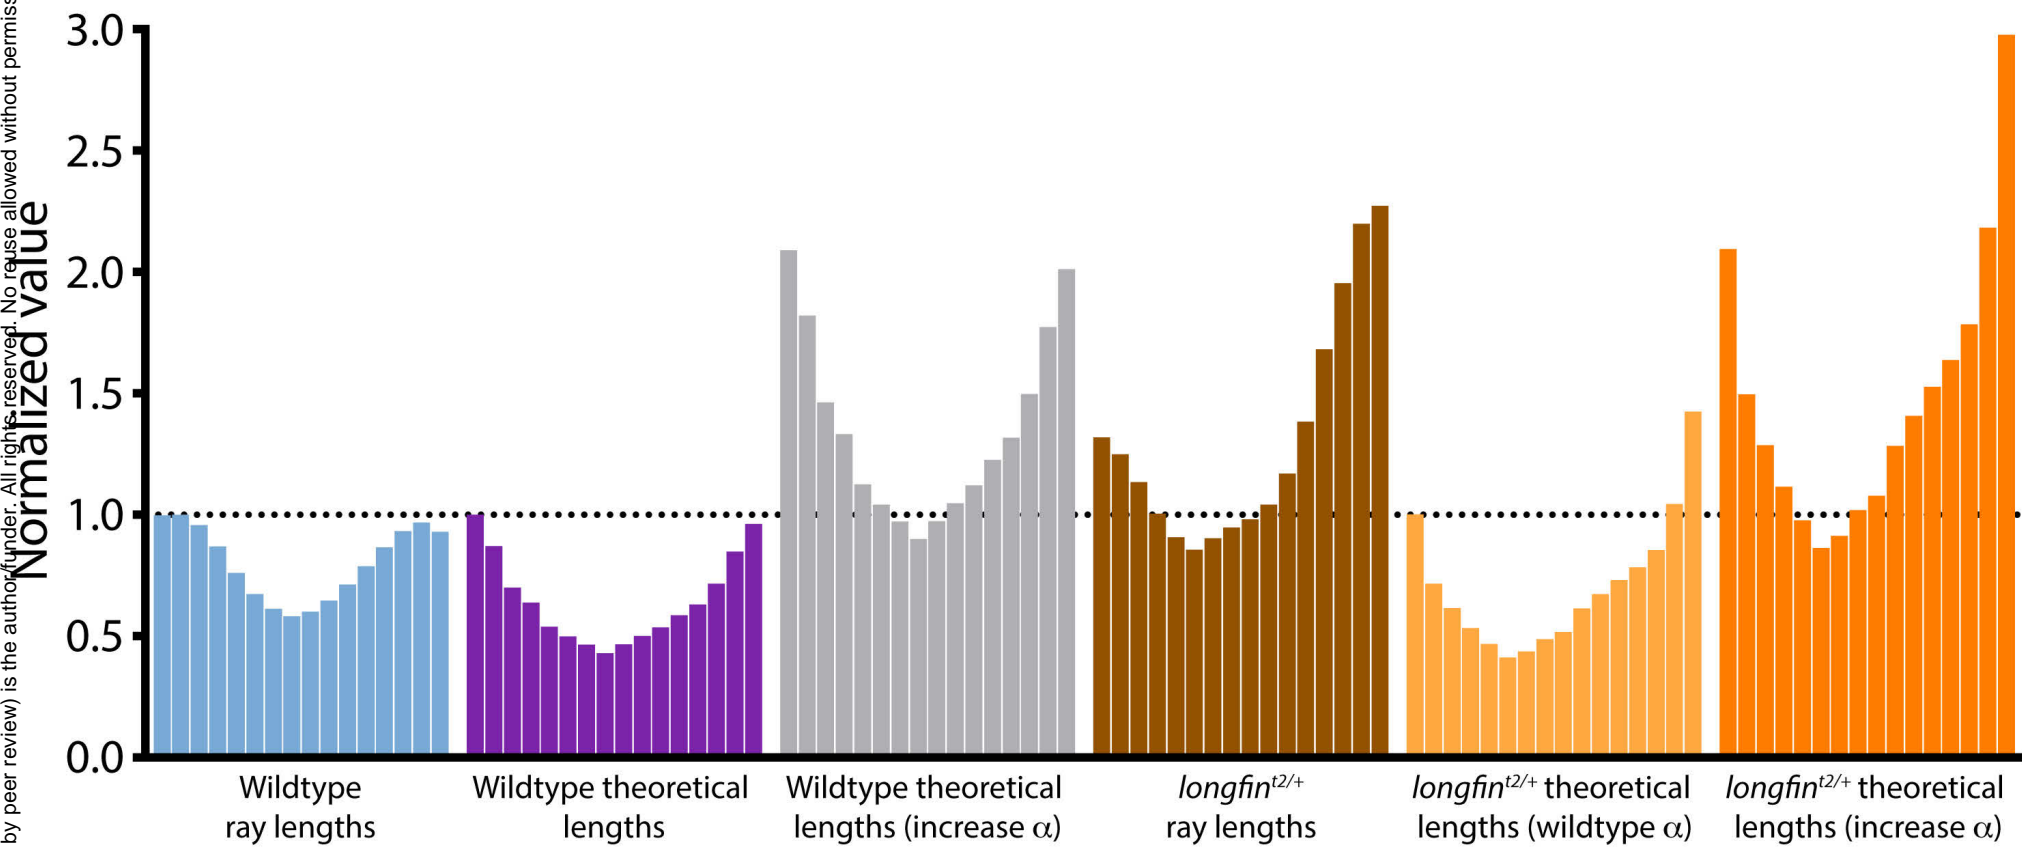

Extended Data Figure 10

**Extended Data Figure 10. *longfin* fin ray skeletal geometry and modeled regeneration suggests *longfin* have deficient niche depletion – a broken “countdown timer”.**

Each distinctly colored set of distributed bars represents actual ray lengths or theoretical regenerated ray lengths for the 16 medial rays (from a fixed proximal-distal position). All ray lengths are normalized to the longest wildtype ray. Theoretical lengths are derived from the transpositional scaling equation, which predicts final length as a function of ray radius, with parameters set to restore the widest wildtype ray to its actual length. The alpha parameter ( $\alpha$ ) then is increased by 2.1x (empirically set by linear regression comparing wildtype and *longfin* ray area to length relationships) to model a decreased rate of niche depletion that would cause wildtype resected rays to theoretically regenerate to a *longfin*<sup>t2/+</sup> length. Applying this same increase in  $\alpha$  but inputting *longfin*<sup>t2/+</sup> ray radii into the transpositional scaling formula successfully predicts *longfin*<sup>t2/+</sup> fin-resected fish would regenerate with a *longfin* phenotype.

## 590 **METHODS**

### **Zebrafish**

Wildtype AB (University of Oregon Zebrafish Facility), *longfin*<sup>1,2</sup>, *Tg(-2.4shha:gfp:ABC)*<sup>3</sup>, *Tg(tph1:mCherry)*<sup>4</sup>, *Tg(dusp6:CreERT)*<sup>5</sup>, and *Tg(eab:FlEx)*<sup>6</sup> zebrafish lines were used. Zebrafish  
595 were housed in the University of Oregon Aquatic Animal Care Services facility at 28-29°C. The University of Oregon Institutional Animal Care and Use Committee oversaw animal use.

### **Transgenic mosaic fin lineage tracing**

Zebrafish embryos carrying the *Tg(dusp6:CreERT)* and *Tg(eab:FlEx)* lines were treated with  
600 low doses of tamoxifen, reared to adulthood, screened for mosaic labeling, caudal fin-amputated, and analyzed by whole mount imaging and antibody staining of sectioned tissue as described previously<sup>5</sup>.

### **Small molecule studies of fin regeneration**

605 The Porcupine inhibitor Wnt-C59<sup>7</sup>, which blocks Wnt secretion, and the FGF receptor tyrosine kinase inhibitor PD173074<sup>8</sup> were dissolved and diluted in DMSO. Caudal fins were amputated at a fixed proximal-distal position or common oblique plane (illustrated in Fig. S1). Fin-resected fish were then immediately placed in drug-containing aquarium water. Animals were transferred to fresh drug-containing water every 48 hours. The final concentration of DMSO in fish water  
610 was 0.01% for all conditions.

For niche depletion experiments with delayed small molecule addition (Fig. S4), fin-resected AB wildtype fish first were allowed to regenerate for 4 days. The animals then were treated with DMSO (0.01%, n = 10), Wnt-C59 (500 nM, n = 10), or PD173074 (5 µM, n = 10)



for another 4 days. Animals were fed and changed to fresh drug-containing water after 48 hours.  
615 At 8 days post-amputation (dpa), animals were returned to plain fish water. In some cases, fins  
were subjected to a second amputation proximal to the original amputation site at 12 dpa.  
Animals were followed for up to 60 dpa, when each fish was imaged using a Leica M165 FC  
stereomicroscope. Representative fish for each condition were visualized using high resolution  
stitched imaging (Nikon Eclipse Ti widefield microscope and NIS-Elements software) before  
620 drug treatment, immediately after drug treatment, and at the experiment's conclusion.  
Regeneration was quantified by scoring the number of fully regenerated individual rays. This  
complete experiment was repeated three times with the same outcomes.

### **RNA-Seq**

625 Caudal fins of adult *Tg(-2.4shha:gfp:ABC)* zebrafish were resected. At 4 dpa, dissected  
regenerated tissue at and beyond the distal GFP-marked epidermal domains was collected as  
“distal regenerate” samples. The remaining proximal regenerated tissue also was harvested.  
Tissue pooled from four animals constituted matched replicate samples. Tissue was immediately  
placed in TRIzol reagent (Thermo Fisher) and homogenized. RNA was isolated following the  
630 manufacturer's instructions with minor alterations. The RNA was precipitated overnight at -80°C  
and then pelleted at 15,000 rpm for 30 minutes at 4°C. Pellets were washed twice with 70%  
ethanol, dried for 10 minutes at room temperature, and resuspended in RNase-free water  
(Thermo Fisher).

RNA-Seq libraries were prepared from 1 µg of isolated RNA using a Kapa Biosystems  
635 Stranded mRNA-Seq kit. Bar-coded libraries were pooled and sequenced using a NextSeq 500  
(Illumina). Illumina reads were aligned to the zebrafish genome (GRCz11) using TopHat<sup>2</sup>.

Gene-assigned aligned reads were counted using HTseq<sup>10</sup>. DEseq<sup>11</sup> was used to determine differential expression of 1147 genes annotated to have “transcription regulator activity” (GO:0140110) by AmiGO 2<sup>12-14</sup>. Genes below the 40% quantile for total counts were filtered out  
640 to improve the statistical analysis of relatively highly expressed genes.

### Immunostaining and in situ hybridization

Immunostaining was performed on paraffin sections as described<sup>15</sup>. Antibodies used were: Runx2 (Santa Cruz Biotechnology, 27-K, 1:500-1000 dilution); Dach (Proteintech Group,  
645 1:2000); Msx (Developmental Studies Hybridoma Bank, tissue culture supernatant, 1:15-20); Snail (Developmental Studies Hybridoma Bank, ascites, 1:100); mCherry (Takara Bio or Novus Biologicals, 1:100). For Snail/Dach double immunostaining, Dach antibodies were used at 1:1000 and sodium dodecyl sulfate (SDS) was added to 0.005% during the primary antibody incubation step. Immunostained sections were imaged using either Olympus FV1000 or Zeiss  
650 LSM 880 laser scanning confocal microscopes.

Whole mount in situ hybridization using DIG-labeled probes followed established procedures<sup>15</sup>. The *wnt5a* probe was described previously<sup>15</sup>. Templates for *dacha* and *dachc* probes were amplified by PCR from regenerating fin cDNA using the indicated primers, where the reverse primer contains a T7 promoter sequence (in caps) for in vitro transcription using DIG  
655 labeling mixtures (Roche) and T7 RNA polymerase:

*dacha* forward: 5'-atggccgtatctgcaactcctccggtgc-3'

*dacha* reverse: 5'-TAATACGACTCACTATAGGGTcagtacatgatggggggttgagtagg-3'

*dachc* forward: 5'-atgcccacgcgcctccga-3'

*dachc* reverse: 5'-TAATACGACTCACTATAGGGTcagtacatcattgtggactttagaaagagcctt-3'

660 The *snai2* probe template was generated by PCR amplifying its coding sequence from regenerating fin cDNA using the following primers followed by ligation to the pCRII vector (Thermo Fisher).

*snai2* forward: 5'-atgcctcggtcattcctagtaaagaagc-3'

*snai2* reverse: 5'-tcagtgtgcatgcaacagccag-3'

665 The resulting plasmid was linearized and a DIG-labeled probe synthesized by in vitro transcription using SP6 RNA polymerase.

### **5-ethynyl-2'-deoxyuridine (EdU) incorporation and staining**

10 µg of EdU in saline was intraperitoneally injected into wildtype fish 92 hours post caudal fin  
670 amputation. Fin tissue was collected 4 hours later, fixed, and processed for paraffin sectioning. EdU detection used a Click-iT kit (Thermo Fisher) combined with immunostaining as described above using Dach antibodies.

### **X-ray micro computed-tomography imaging**

675 An adult wildtype zebrafish was sacrificed and fixed in 4% PFA for 24 hours. The specimen was stabilized within a 15 ml conical tube and its caudal fin scanned using a VivaCT 80 (SCANCO Medical) with 55 kVp X-ray source energy, 145 µA current, 6.5 µm pixel size and 1000 ms per projection integration time. Slice images were reconstructed to a 1590x1590 pixel matrix using an automated cone beam convolution backprojection algorithm. The resulting 2-D images were  
680 output for 3-D reconstruction using Imaris 9.3 software (Bitplane).

### **Morphometrics and mathematical modeling**

Rays were considered as simple cylinders to facilitate modeling regenerative fin outgrowth as a function of skeletal geometry. A given bony ray segment's volumetric capacity for injury-  
685 activated, niche-forming intra-ray mesenchyme<sup>4</sup>, then could be estimated by first measuring the ray's width (= diameter) at a hypothetical amputation site. For modeling purposes, the square of the ray's radius was used as a proxy as normalized areas and volumes (for cylinders of a fixed length) are mathematically identical.

Caudal fins of five-month-old *longfin*<sup>l2/+</sup> and wildtype clutchmate fish were imaged using  
690 differential interference contrast microscopy and multi-field stitching (Nikon Eclipse Ti and NIS-Elements) for morphometrics. Fish were euthanized by tricaine bath overdose and mounted in 0.75% low melt agarose / PBS on microscope slides. The fins were gently fanned out using a horse hair brush to fully extend the tissue and separate rays. The initial proximal-distal positions for ray measurements were determined by first identifying the end of the innermost truncated  
695 rays (lateral “mini-rays” that, unlike the standard 18 caudal rays, do not extend the full distance of the fin, shown in Extended Data Fig. 1). A line was drawn across the fin that intersected points two ray bone segments preceding the end of the mini-rays on the fin's dorsal and ventral sides. The width of each ray was measured where it intersected this transverse line.

Similarly, polylines (using anchored points to allow for shifts in ray orientation) starting  
700 from the same proximal-distal position were drawn along each ray and then directly in between branches of a given “mother ray” until reaching the fin tip. The lengths of these lines defined how much each ray would have to regenerate to restore the fin's original size. Lengths were normalized to the longest wildtype ray. Repeated measures taken every three bone segments along the proximal-distal axis for rays 3, 4, 15, 16 used the same procedure, with lengths  
705 representing the distance from the diameter-measurement position to the end of the ray.

We derived a mathematical model for “Transposition Scaling” that predicts the extent of regenerative outgrowth as a function of skeletal geometry – the bony ray’s capacity for niche-originating mesenchyme. First, we considered the number of niche cells released at a cut site as:

$$N_0 \equiv \beta\pi r^2$$

where  $r$  is the radius of the ray at the cut site and  $\beta$  is the average number of niche cells released per unit area. Niche cells can then proliferate (given by  $k_g$ ) or convert to a differentiated, mesenchymal state (given by  $k_q$ ). The change in the number of niche cells per unit time is:

$$\frac{dN}{dt} = (k_g - k_q)N(t)$$

The difference in these rates can be summarized by  $\alpha \equiv (k_g - k_q)$ . Using the boundary condition that  $N(0) = N_0$ , the solution to this first-order differential equation is:

$$N(t) = \beta\pi r^2 e^{\alpha t}$$

We model bony ray growth rate as directly proportional to the number of niche cells, controlled by  $k_l$ :

$$\frac{dl}{dt} = k_l N(t) = k_l \beta\pi r^2 e^{\alpha t}$$

Using the boundary condition that  $l(0) = 0$ , the solution to this differential equation is:

$$l(t) = \frac{k_l \beta\pi r^2}{\alpha} (e^{\alpha t} - 1)$$

To link the number of cells released to the final ray length, we assume that skeletal growth stops when the number of cells reaches  $N_\phi$ , the minimum number of cells required to support growth.

This happens at  $t_{end}$ :

$$N_\phi = \beta\pi r^2 e^{\alpha t_{end}}$$

We then solve for  $t_{end}$ :

$$t_{end} = \frac{\ln\left(\frac{N_{\Phi}}{\beta\pi r^2}\right)}{\alpha}$$

and substitute into our model for  $l(t)$ :

$$l(t_{end}) = \frac{k_l\beta\pi r^2}{\alpha} \left( e^{\alpha \frac{\ln\left(\frac{N_{\Phi}}{\beta\pi r^2}\right)}{\alpha}} - 1 \right)$$

$$l(t_{end}) = \frac{k_l\beta\pi r^2}{\alpha} \left( \frac{N_{\Phi}}{\beta\pi r^2} - 1 \right)$$

This gives the final relationship:

$$l(t_{end}) = \frac{k_l}{\alpha} (N_{\Phi} - \beta\pi r^2)$$

where  $k_l$  is the length growth rate per niche cell,  $\alpha$  is the difference between the niche cell growth rate and their conversion back to intra-ray mesenchymal cells,  $N_{\Phi}$  is the minimum number of cells required to support growth, and  $\beta$  reflects how many niche cells are released per bony ray cross-sectional area.

### Fin regeneration outgrowth measurements

Caudal fins from clutchmate *longfin*<sup>+/+</sup> and *longfin*<sup>t2/+</sup> animals were amputated at the same position along the proximal-distal axis (Extended Data Fig. 1) and allowed to regenerate for 30 days. Outgrowth measurements were taken every 24 hours from 1-8 dpa and every 48 hours from 10-30 dpa. The length of the third ray (Extended Data Fig. 1) from the amputation site to the fin's tip was measured from images acquired with a Leica M205 FA stereomicroscope. Stitched fin images of zebrafish euthanized with tricaine and mounted in 0.75% low melting agarose were captured using a Nikon Eclipse Ti widefield microscope and NIS-Elements software. Data points were fit to user-defined transpositional scaling equations (see Mathematical modeling) by

nonlinear regression using GraphPad Prism. The  $\alpha$ ,  $\beta$ , and  $k_l$  parameters were allowed to vary to generate best-fit curves.  $\beta$  and  $k_l$  were nearly identical between the wildtype and *longfin*<sup>t2/+</sup> data sets. In contrast,  $\alpha$  was 3.0x higher for *longfin*<sup>t2/+</sup>, similar to the  $\alpha$  difference (2.1x) derived from  
740 the geometrical (rather than growth rate) analysis.

### **Data availability**

RNA-Seq data are deposited at the NCBI Gene Expression Omnibus (GSE125859).

745 **METHODS REFERENCES**

1. Van Eeden, F. J. *et al.* Genetic analysis of fin formation in the zebrafish, *Danio rerio*. *Development* **123**, 255–262 (1996).
- 750 2. Maderspacher, F. & Nüsslein-Volhard, C. Formation of the adult pigment pattern in zebrafish requires leopard and obelix dependent cell interactions. *Development* **130**, 3447–3457 (2003).
- 755 3. Shkumatava, A., Fischer, S., Müller, F., Strähle, U. & Neumann, C. J. Sonic hedgehog, secreted by amacrine cells, acts as a short-range signal to direct differentiation and lamination in the zebrafish retina. *Development* **131**, 3849–3858 (2004).
4. Tornini, V. A. *et al.* Live Monitoring of Blastemal Cell Contributions during Appendage Regeneration. *Curr. Biol.* **26**, 2981–2991 (2016).
- 760 5. Stewart, S. & Stankunas, K. Limited dedifferentiation provides replacement tissue during zebrafish fin regeneration. *Developmental Biology* **365**, 339–349 (2012).
- 765 6. Boniface, E. J., Lu, J., Vicotroff, T., Zhu, M. & Chen, W. FIEEx-based transgenic reporter lines for visualization of Cre and Flp activity in live zebrafish. *Genesis (New York, N.Y. : 2000)* **47**, 484–491 (2009).
7. Proffitt, K. D. *et al.* Pharmacological inhibition of the Wnt acyltransferase PORCN prevents growth of WNT-driven mammary cancer. *Cancer Res.* **73**, 502–507 (2013).
- 770 8. Mohammadi, M. *et al.* Crystal structure of an angiogenesis inhibitor bound to the FGF receptor tyrosine kinase domain. *EMBO J.* **17**, 5896–5904 (1998).
- 775 9. Kim, D. *et al.* TopHat2: accurate alignment of transcriptomes in the presence of insertions, deletions and gene fusions. *Genome Biol.* **14**, R36 (2013).
10. Anders, S., Pyl, P. T. & Huber, W. HTSeq--a Python framework to work with high-throughput sequencing data. *Bioinformatics* **31**, 166–169 (2015).
- 780 11. Anders, S. & Huber, W. Differential expression analysis for sequence count data. *Genome Biol.* **11**, R106 (2010).
12. Ashburner, M. *et al.* Gene ontology: tool for the unification of biology. The Gene Ontology Consortium. *Nature Genetics* **25**, 25–29 (2000).
- 785 13. Gene Ontology Consortium *et al.* Gene Ontology annotations and resources. *Nucleic Acids Res.* **41**, D530–5 (2013).
14. Carbon, S. *et al.* AmiGO: online access to ontology and annotation data. *Bioinformatics* **25**, 288–289 (2009).



790

15. Stewart, S., Gomez, A. W., Armstrong, B. E., Henner, A. & Stankunas, K. Sequential and opposing activities of Wnt and BMP coordinate zebrafish bone regeneration. *Cell Reports* **6**, 482–498 (2014).

795
